## A subtype of melanopsin ganglion cells encodes ground luminance

Michael H. Berry<sup>1,2</sup>, Michael Moldavan<sup>3,4</sup>, Tavita Garrett<sup>1,5</sup>, Marc Meadows<sup>5,6</sup>, Olga Cravetchi<sup>3,4</sup>, Elizabeth White<sup>1</sup>, Henrique von Gersdorff<sup>1,2,6</sup>, Kevin M Wright<sup>6</sup>, Charles Allen<sup>3,4</sup>, Benjamin Sivyer<sup>1,2,\*</sup>

1. Department of Ophthalmology, Casey Eye Institute

2. Department of Chemical Physiology and Biochemistry

3. Oregon Institute of Occupational Health Sciences

4. Department of Behavioral Neuroscience

5. Neuroscience Graduate program

6. Vollum Institute

Oregon Health & Science University, Portland, OR, 97239

\* Corresponding author: [sivyer@ohsu.edu](mailto:sivyer@ohsu.edu)

### Abstract

Visual input to the hypothalamus from intrinsically photosensitive retinal ganglion cells (ipRGCs) influences several functions including circadian entrainment, body temperature, and sleep. ipRGCs also project to nuclei such as the supraoptic nucleus (SON), which is involved in systemic fluid homeostasis, maternal behavior, and appetite. However, little is known about the SON-projecting ipRGCs or their relationship to well-characterized ipRGC subtypes. Using a *GlyT2<sup>Cre</sup>* mouse line, we identify a subtype of ipRGCs restricted to the dorsal retina that selectively project to the SON. These ipRGCs form a non-overlapping tiled mosaic that is limited to a dorsal region of the retina, forming a substrate for encoding ground luminance. Optogenetic activation of their axons demonstrates they release the neurotransmitter glutamate and that the SON is retinorecipient, receiving synaptic input from dorsal ipRGCs. Our results challenge the idea that ipRGC dendrites overlap to optimize photon capture and suggests non-image forming vision operates to sample local regions of the visual field.

### Introduction

## A subtype of melanopsin ganglion cells encodes ground luminance

41 In addition to the rod and cone photoreceptors that are used for image-forming vision, the  
42 mammalian retina contains intrinsically photosensitive retinal ganglion cells (ipRGCs) that  
43 primarily drive non-image forming behaviors<sup>1,2</sup>. ipRGCs express their own photopigment,  
44 melanopsin<sup>3</sup>, and project to a diverse array of central brain regions<sup>4-6</sup> influencing many  
45 homeostatic functions including circadian entrainment, pupil constriction, body  
46 temperature, sleep and mood<sup>7-11</sup>. There are six main *types* of ipRGCs (M1-M6), which  
47 are categorized according to their dendritic morphology, melanopsin expression, gene  
48 expression, and central projection locations<sup>6,12</sup>. The most studied of these, the M1  
49 ipRGCs, have dendrites that occupy the OFF layer of the inner plexiform layer (IPL). They  
50 form the primary projections to the suprachiasmatic nucleus (SCN), which is the master  
51 circadian clock<sup>7,13-16</sup>, and the shell of the olivary pretectal nucleus (OPN), which serves  
52 as the primary site of light dependent pupillary constriction<sup>8,17,18</sup>. They also project to a  
53 number of lateral hypothalamic brain regions, such as the supraoptic nucleus (SON),  
54 ventral lateral preoptic area (VLPO), and medial amygdaloid nucleus, though the  
55 functional role of these projections remains unclear<sup>4,6,16</sup>.

56  
57 The retinal responses of M1 ipRGCs are suited to their primary role in non-image forming  
58 vision; their long and sustained responses to bright illumination reflect their comparatively  
59 high expression of melanopsin and weak photoreceptor-mediated synaptic drive from  
60 retinal bipolar cells<sup>6,19</sup>. These light responses are optimal for signaling absolute light  
61 intensity and driving behaviors that are slow, such as circadian entrainment, and the  
62 maintained component of the pupillary light reflex<sup>17,20,21</sup>. M1 ipRGCs were first thought to  
63 comprise a single, homogenous population however, the discovery of a sub-population  
64 lacking *Brn3b* expression<sup>18</sup>, the divergent projection patterns of M1 ipRGCs according to  
65 *Brn3b* expression<sup>16,18</sup>, and the diversity of light responses within M1 ipRGCs<sup>22,23</sup> together  
66 suggest there are multiple M1 subtypes mediating different roles in non-image forming  
67 behavior.

68  
69 The high density of M1 ipRGCs in the retina also suggests they comprise multiple  
70 subtypes. Conventional RGCs within a functional subtype are commonly arranged in  
71 evenly spaced mosaics where their dendrites form territories with minimal overlap<sup>24,25</sup>.

## A subtype of melanopsin ganglion cells encodes ground luminance

72 This arrangement is thought to optimize the sampling of visual space<sup>26-28</sup> and reduces the  
73 encoding of redundant information, where each RGC subtype samples an even  
74 component of the visual field across the retina. Previous reports indicate M1 ipRGC  
75 dendrites are not territorial and they overlap considerably - about 4 fold<sup>29</sup>. This might be  
76 due to their non-image forming role, where the even representation of visual space is  
77 forgone in favor of increasing their dendritic surface area, thus maximizing the surface  
78 area for photon capture. Alternatively, they might comprise multiple functional subtypes,  
79 each of which independently tiles the retina. We provide evidence for the latter, illustrating  
80 that like conventional RGCs, ipRGCs are arranged in mosaics optimal for the even  
81 representation of visual space. But the retinal distribution of ipRGCs and how this relates  
82 to specific subtypes of M1 ipRGCs has remained elusive.

83  
84 Here we provide the first evidence that like conventional RGCs, ipRGCs are arranged in  
85 a tiled mosaic optimal for the even representation of visual space. We use a combination  
86 of mouse genetics, confocal microscopy, anterograde and retrograde labelling, patch  
87 clamp recordings and optogenetics to describe a subtype of M1 ipRGCs that are found  
88 only in the peripheral dorsal retina. They form a regularly spaced mosaic within this region  
89 suggesting mice devote additional melanopsin-dependent processing power to their  
90 ventral visual field. This subtype of M1 ipRGCs forms the primary visual projection to the  
91 SON, and project to unique sub-regions of other non-image forming brain nuclei, like the  
92 SCN and IGL, where they release the excitatory neurotransmitter glutamate, despite  
93 having *Cre* expression driven by the promotor of the glycine transporter GlyT2.

94

## 95 **Results**

### 96 **A unique population of ipRGCs encoding ventral vision**

97 We discovered RGCs in mice where *Cre* is driven by a BAC encoding the inhibitory  
98 glycine transporter GlyT2 (*slc6a5* KF109;<sup>30</sup> Fig. 1a). In these mice, *Cre* is expressed both  
99 in GABAergic and glycinergic neurons in the retina and brain<sup>31</sup>. In retina, *Cre* expression  
100 is overwhelmingly restricted to inhibitory amacrine cells such as the glycinergic All  
101 amacrine cell<sup>32</sup>. However, we also observed fluorescent axons in the ganglion cell layer  
102 (Fig. 1a), and when following them to the optic nerve head discovered they originated

## A subtype of melanopsin ganglion cells encodes ground luminance

103 solely from RGCs in the dorsal retina (Fig. 1c). Hypothesizing these RGCs likely represent  
104 a unique feature selective population in the retina, we sought to determine their functional  
105 identity by mapping their central axonal projections in the brain with *Cre*-dependent  
106 anterograde labelling of their axon terminals and their light responses and dendritic  
107 morphology with targeted electrophysiological recordings and Neurobiotin fills.

108  
109 To determine the location of the central projections of their axon terminals, we injected  
110 an AAV into the eye enabling the *Cre*-dependent expression of fluorescent protein (Fig.  
111 1b). The axons of RGCs labeled using this method predominantly innervated non-image  
112 forming brain regions such as the intergeniculate leaflet (IGL) and suprachiasmatic  
113 nucleus or nuclei (SCN) (Fig. 1d), suggesting they arose from ipRGCs, which form the  
114 predominant projections to these regions. To confirm their identity in the retina, we  
115 performed melanopsin antibody co-staining in *GlyT2<sup>Cre</sup>;Ai140* mice (Fig. 1e) and  
116 *GlyT2<sup>Cre</sup>;Ai9* mice (Fig. S1) and found that fluorescent RGCs in the dorsal retina co-  
117 expressed melanopsin. We subsequently targeted fluorescent cell bodies in isolated  
118 preparations of dorsal retina from *GlyT2<sup>Cre</sup>;Ai9* mice for electrophysiological spike  
119 recordings. Current clamp recordings from fluorescent somas allowed us to confirm  
120 intrinsically photosensitive spike responses in the presence of a cocktail of excitatory  
121 synaptic blockers (Fig. 1f; 20  $\mu$ M L-AP4, 25  $\mu$ M DAP5, 20  $\mu$ M CNQX).

122  
123 To identify the dendritic morphology of these ipRGCs, we performed cell targeted  
124 Neurobiotin fills in the RGC layer of *GlyT2<sup>Cre</sup>;Ai9* retina. These experiments revealed they  
125 are predominantly comprised of an OFF stratifying type, a structural feature of M1 ipRGCs  
126 <sup>33,34</sup> (Fig. 2a). We also found they contained a secondary population stratifying in the ON  
127 layer, with variable morphologies, resembling a mixture of non-M1 ipRGCs<sup>35-38</sup>.  
128 Characterizing their dendritic structure using Sholl analysis (Fig. 2b), we found that the  
129 morphological complexity of the OFF stratifying cells, including the total number of  
130 branching points, junctions, and end-points are distinct from the mixture of ON stratifying  
131 cells (Fig. 2b,c). Furthermore, the soma diameter (Fig. 2d), dendritic diameter (Fig. 2e),  
132 and pattern of Sholl crossings (Fig. 2b) measured in the OFF stratifying cells are  
133 consistent with previous studies of M1 type morphology.

## A subtype of melanopsin ganglion cells encodes ground luminance

134  
135 To determine the spatial location of *GlyT2<sup>Cre</sup>*-positive ipRGCs, we generated distribution  
136 maps in wholemount preparations of *GlyT2<sup>Cre</sup>;Ai140* retina using melanopsin antibody co-  
137 staining and confocal microscopy. *GlyT2<sup>Cre</sup>*-expressing cells (Fig. 3a,b), and melanopsin  
138 expressing ipRGCs (Fig. 3c,d) were found across the entire retina (Fig. 3b,d). However,  
139 GFP-positive ipRGCs (Fig. 3e) were localized to the dorsal periphery of the retina (Fig.  
140 3f), interspersed among other dorsal ipRGCs (Fig. 3e). Their location in the dorsal retina  
141 resembles the asymmetric distribution of cone photoreceptors, more specifically the  
142 region of retina that contains predominately green cones and few UV cones<sup>39,40</sup>. Co-  
143 staining with the mouse s-opsin antibody that selectively labels UV opsin we show that  
144 *GlyT2<sup>Cre</sup>*-positive expressing ipRGCs are located above the UV cone transition zone (Fig.  
145 3g,h), occupying the dorsal region of retina with low UV cone density (Fig. 3f,h,g).

146  
147 Previous studies report that M1 ipRGCs are denser in the dorsal retina<sup>3,41-43</sup>, so we  
148 reasoned that *GlyT2<sup>Cre</sup>*-expressing M1 ipRGCs might be a unique subtype that accounts  
149 for the asymmetry. If our hypothesis is correct, the density of M1 ipRGCs in the dorsal  
150 and ventral retinas should be the same if we discount the *GlyT2<sup>Cre</sup>*-positive M1 ipRGCs.  
151 To test this hypothesis we examined the retinal distribution of all M1 ipRGCs using  
152 confocal microscopy. M1 ipRGCs have sparse dendritic arbors stratifying in the OFF IPL  
153 (Fig. 4a) and express the highest amount of melanopsin<sup>29,34</sup>, making them easier to  
154 identify using immunohistochemistry and confocal microscopy. Whole retina density  
155 maps of M1 ipRGCs ( $n \approx 800$  cells) confirm their increased dorsal density (Fig. 4b)<sup>42</sup> and  
156 they were evenly interspersed with *GlyT2<sup>Cre</sup>* M1 ipRGCs (Fig. 4c,  $n \approx 150$  cells). When  
157 we subtracted *GlyT2<sup>Cre</sup>*-positive ipRGCs (Fig. 4d-g), the density of M1 ipRGCs between  
158 the dorsal and ventral retina were equivalent, confirming our hypothesis (Fig 4i, j). These  
159 results suggest the mouse visual system dedicates an additional M1 ipRGC visual  
160 channel to the ventral visual field. We reasoned this anatomical segregation in the retina  
161 might be mirrored in their central axonal projections, which are segregated in previously  
162 identified subtypes of M1 ipRGCs. These distinct separations of ipRGC central  
163 projections underlie distinct behavioral functions<sup>10,16,18</sup>.

164

## A subtype of melanopsin ganglion cells encodes ground luminance

### 165 ***GlyT2<sup>Cre</sup>* ipRGCs innervate the outer core of the SCN**

166 To determine the central axon projection sites of *GlyT2<sup>Cre</sup>*-positive ipRGCs we performed  
167 intravitreal eye injections of *Cre*-dependent AAV (Fig 1, Fig. S2). Cholera toxin B (CTB),  
168 was later injected to co-label retinorecipient axon terminals (Fig. S2). To provide  
169 anatomical reference, these regions were also compared with the CTB labeled  
170 projections of all RGCs (Fig. S5a,d,g,j) and eye injections performed in the *OPN4<sup>Cre</sup>*  
171 transgenic mouse, a line which labels all ipRGCs (Fig. S5c,f,i,l). Summary central  
172 projection traces were also generated for the *GlyT2<sup>Cre</sup>* ipRGCs (Fig. S6). Like many other  
173 ipRGCs, *GlyT2<sup>Cre</sup>*-positive ipRGCs project to the SCN, but this projection is unique for  
174 several reasons. First, their axonal projections to the SCN avoid a central core region  
175 (Fig. 5a), and are concentrated at the ventral and lateral regions (Fig. 5a,b,d). Serial  
176 sections through the SCN in *GlyT2<sup>Cre</sup>;Ai32* mice, which express *CHR2-eyfp* in the axon  
177 terminals of the *GlyT2<sup>Cre</sup>*-positive ipRGCs, illustrate that their axons did not project to the  
178 classically defined shell of the SCN (Fig. 5 c,e & Fig. S3), which is delineated by the  
179 anatomical localization of neurons that express arginine vasopressin (AVP)<sup>44-49</sup>. Rather,  
180 they project to a subregion of the classical core, which we refer to as the *outer core* as  
181 their axons avoid AVP neurons (Fig 5c,d,e,i). In the anterior SCN, their axon terminals  
182 were located ventrally (Fig. 5i & Fig. S3a) in a region associated with neurons expressing  
183 vasoactive intestinal peptide<sup>44</sup>. In more caudal regions their axons formed a peripheral  
184 shell around the SCN core, and were densest in the ventral and lateral regions (Fig. 5c, l  
185 & Fig. S3b,c). At the most caudal region of the SCN, their axon terminals formed a *lateral*  
186 *band* with excursions outside of the SCN into the anterior hypothalamus and  
187 lateroanterior hypothalamus (Fig. 5d,e,i & Fig. S3d). The projections suggest that  
188 *GlyT2<sup>Cre</sup>*-positive ipRGCs likely contribute to distinct functional light-entrainment of  
189 circadian rhythms. The functional role of their projections to the AHC and LA outside of  
190 the SCN remain unclear however these regions are thought to be involved in  
191 thermoregulation<sup>50</sup> and aggression control<sup>51-53</sup>.

192  
193 Outside of the SCN the *GlyT2<sup>Cre</sup>* positive ipRGCs innervated the SON, which contains  
194 neurons expressing AVP and oxytocin (Fig. 5d-i) and is thought to be involved in systemic  
195 fluid homeostasis<sup>54</sup>, parturition<sup>55</sup>, and appetite<sup>56,57</sup>. It is also thought that the innervation

## A subtype of melanopsin ganglion cells encodes ground luminance

196 of this region is exclusively from Brn3b+ M1 ipRGCs<sup>4,6,16</sup>. *GlyT2<sup>Cre</sup>*-positive ipRGC axons  
197 most prominently innervated the region of the SON immediately dorsal to the optic tract  
198 and dorsomedial to the SON known as the perinuclear zone (Fig. 5d; pSON)<sup>4,16,58</sup>. Some  
199 of their axons did however, innervate the SON in addition to extending medially into the  
200 lateral hypothalamus (Fig. 5f-h,j & Fig. S4a). Outside of the hypothalamus, their axons  
201 formed prominent projections to the zona incerta (Fig. S4b)<sup>4</sup>, IGL and parvocellular  
202 division of the vLGN (Fig. S5b), the lateral posterior nucleus (Fig. S5b), the ventral shell  
203 of the OPN (Fig. S4b,d,e - blue) and pretectal regions ventral to the superior colliculus  
204 (Fig. S5d,e,g,h,j,k). Many of these *GlyT2<sup>Cre</sup>* ipRGC projections, particularly the SON,  
205 accessory hypothalamic nuclei, and the OPN shell are regions thought to be innervated  
206 primarily by M1 ipRGCs<sup>6</sup>.

207

208

### 209 **SON-ipRGCs: a mosaic of ipRGCs retro-labeled from the SON**

210 Due to the heavy innervation of the pSON and surrounding areas when compared with  
211 previous reports, we hypothesized that (1) *GlyT2<sup>Cre</sup>*-positive ipRGCs may be the sole  
212 projection to this region, and (2) that only the M1 morphological type of *GlyT2<sup>Cre</sup>*-positive  
213 ipRGCs project to this region<sup>15,59</sup>. Since it is comparatively isolated from the SCN and the  
214 LGN, we decided to selectively target M1 *GlyT2<sup>Cre</sup>*-positive ipRGCs using retrograde  
215 injections of Cre-dependent AAV injected into the pSON (Fig. 6a,b). These injections  
216 labeled melanopsin positive M1 ipRGCs in the retina with dendrites in the OFF layer which  
217 restricted to the dorsal hemisphere and in similar density to those identified in  
218 *GlyT2<sup>Cre</sup>;Ai140* (Fig. 6c,f,g;  $113 \pm 5.4$ ;  $n = 2$  mice). Next, we performed the same injections  
219 in *OPN4<sup>Cre</sup>* mice, which expresses Cre in all ipRGCs, to determine if the dorsal location  
220 and OFF stratification of these SON-labeled ipRGCs is specific to neurons expressing  
221 *GlyT2<sup>Cre</sup>* (Fig. 6d-g). Significantly, the majority of ipRGCs labeled with these injections  
222 were OFF-stratifying M1 ipRGCs (~97%) (Fig. 6d,e,f) and located in the dorsal retina in  
223 similar quantity and distribution to those labeled in *GlyT2<sup>Cre</sup>* mice ( $n = 131 \pm 16.4$  OFF  
224 ipRGCs,  $n = 4 \pm 1$  ON ipRGCs,  $n = 3$  animals) and similar in number to those quantified  
225 from our counts of GFP and melanopsin positive M1 ipRGCs in *GlyT2<sup>Cre</sup>;Ai140* mice (Fig.  
226 6f & Fig. 4).

## A subtype of melanopsin ganglion cells encodes ground luminance

227  
228 We observed a small number of ventral OFF ipRGCs labeled by AAV injections into the  
229 SON in *OPN4<sup>Cre</sup>* mice, in addition to a small number of ON ipRGCs (Fig. 6d,f;  $n = 27 \pm$   
230  $5.5$  ipRGCs). As these ipRGCs were (1) rarely labeled, (2) restricted to small regions, and  
231 (3) the ON ipRGCs were also predominantly in the ventral retina, we conclude that this is  
232 most likely due to spillover of AAV into the optic tract which lies immediately ventral to the  
233 SON. We also noticed some non-ipRGCs, which appeared to be amacrine cells labeled  
234 in the retina (*GlyT2<sup>Cre</sup>*  $2 \pm$  SD 2.6 neurons from 3 mice; *OPN4<sup>Cre</sup>*  $5.3 \pm$  SD 5 neurons from  
235 3 mice). We conclude that their labeling likely arose from trans-synaptic labelling, or viral  
236 spillover from ipRGCs in the retina, as they do not have axons passing out of the retina.  
237 Together these data suggest that the dorsal *GlyT2<sup>Cre</sup>* ipRGCs represent the sole  
238 retinorecipient projection to the SON, and further strengthens our conclusions from  
239 anatomical mapping data illustrating these ipRGCs represent a distinct subtype that is  
240 located solely in the dorsal retina. Because these ipRGCs represent the exclusive  
241 projection to the SON, we now refer to them as SON-ipRGCs.

242  
243 We noticed that SON-ipRGCs were evenly spaced in our anatomical mapping  
244 experiments and uniform mosaic distribution of RGCs is one of the defining  
245 characteristics of a unique functional subtype. Our retro-labelling of SON ipRGCs with  
246 brain injections into *GlyT2<sup>Cre</sup>* and *OPN4<sup>Cre</sup>* mice was even more striking. The dendrites of  
247 SON-ipRGCs in the dorsal retina formed non-overlapping territorial mosaics, reminiscent  
248 of other territorial RGC subtypes (Fig. 7a-c)<sup>24,25</sup>. Upon close examination using confocal  
249 microscopy, the dendrites of SON-ipRGCs overlapped with the dendrites of other OFF  
250 stratifying ipRGCs in sublamina-a of the IPL stained with anti-melanopsin, and displaced  
251 M1 ipRGCs somata (Fig. 7d). SON ipRGCs have a uniform and unique dendritic  
252 morphology with 3-4 short dendritic segments that project through the ON layer and  
253 extend their terminal dendrites in the OFF layer (Fig. 7e,f). To provide a quantitative  
254 framework of analysis of the mosaic distribution of SON ipRGCs, we quantified (1) the  
255 density recovery profile<sup>60,61</sup>, a measurement of cell density at increasing distances from  
256 the soma (Fig. 7g & Fig. S7a,b,d), and (2) the coverage factor, which is a quantitative  
257 measurement of dendritic overlap in mosaic distributions (Fig. 7h & Fig. S7c). Our density



## A subtype of melanopsin ganglion cells encodes ground luminance

258 recovery profile data indicated that M1 ipRGCs and non-SON projecting M1 ipRGCs  
259 together overlapped significantly as evidenced by high values in very close proximity to  
260 the soma ( $< 100 \mu\text{m}$ ) (Fig. 7g). SON-ipRGCs labeled with retro-injections in *GlyT2<sup>Cre</sup>* and  
261 *OPN4<sup>Cre</sup>* mice exhibited a clearly defined exclusion zone around the soma, which  
262 indicates their cell bodies are regularly spaced (Fig. 7g, Fig. S7). We next examined their  
263 coverage factor, which measures the average number of dendritic fields within a RGC  
264 mosaic overlapping any point in space. Most RGC subtypes that represent a functional  
265 visual channel have a coverage factor  $\sim 2$  indicating there are roughly 2 dendritic fields  
266 (or receptive fields) of each specific functional visual channel at any point in the retina<sup>62</sup>.  
267 To calculate the coverage we used the average dendritic field diameter from  
268 morphological Neurobiotin fills ( $324 \pm 18 \mu\text{m}$ ), as the edges of the dendritic fields labeled  
269 from SON virus injections were difficult to resolve due to their overlap. Using these  
270 measurements we found that SON-ipRGCs had a coverage factor of just over 2 ( $2.2 \pm$   
271  $0.18$  *GlyT2<sup>Cre</sup>*;  $2.1 \pm 0.03$  *OPN4<sup>Cre</sup>*) indicating each point in the dorsal retina is covered by  
272 at least 2 ipRGCs. Non SON-projecting ipRGCs has a coverage of  $3.6 \pm 0.19$ , and all M1  
273 ipRGCs has a coverage factor of  $5.7 \pm 0.16$  (Fig. 7h & Fig. S7c & Supplementary table  
274 2). This indicates that SON ipRGCs are territorial, and provide a seamless coverage of  
275 the retina with minimal overlap, similar to some other highly territorial RGC subtypes<sup>25</sup>.  
276 These results also support the hypothesis that there are two more territorial M1 ipRGCs  
277 subtypes in the dorsal retina or an additional subtype of M1 ipRGCs with higher coverage  
278 and slightly more overlap with SON-ipRGCs. Together, these results strongly support the  
279 hypothesis that there are multiple ipRGC subtypes in the dorsal retina and that SON-  
280 ipRGCs are a unique subtype.

281  
282 Next, we examined other central projection locations following SON injections (Fig. S8).  
283 As these mice only have OFF stratifying SON-ipRGCs labeled in the retinas, this allows  
284 us to determine the projection patterns without contamination from other ON stratifying  
285 ipRGCs that are labeled using anterograde injections into the eye (Fig. 5, S2, & S4). These  
286 results illustrate that the unique projections to the *outer core* of the SCN are from SON-  
287 ipRGCs (Fig. S8d,e) and patterns of innervation appeared similar between *GlyT2<sup>Cre</sup>* and  
288 *OPN4<sup>Cre</sup>* animals. Projections to the IGL, a site of accessory circadian function, was also

## A subtype of melanopsin ganglion cells encodes ground luminance

289 observed (Fig. S8f,g). These results suggest that the IGL, SON and *outer core* of the SCN  
290 are co-innervated by a single dorsal subtype of ipRGCs, the SON-ipRGCs.

291

### 292 **SON-ipRGCs release glutamate at central synapses**

293 Having established that SON-ipRGCs represent a unique subtype of M1 ipRGCs  
294 according to their expression and distribution in the retina, we asked if their targeting in  
295 *GlyT2<sup>Cre</sup>* mice underlies unique neurotransmitter release in the brain. This is particularly  
296 important given the recent discovery that some ipRGCs, which project to the SCN, IGL,  
297 and OPN release GABA at their central synapses<sup>63</sup>. As SON-ipRGCs are labeled in a  
298 mouse line that selectively labels inhibitory neurons throughout the brain and retina, we  
299 asked if they released GABA or glycine using two optogenetic approaches to express  
300 channelrhodopsin in their axon terminals and to record light-evoked neurotransmitter  
301 release (Fig. 8 & Fig. 9). We chose to record from multiple central locations to rule out the  
302 possibility SON-ipRGCs differentially release neurotransmitters at different central  
303 locations. Our recordings were focused primarily in the SCN and IGL, due to their dense  
304 innervation from SON-ipRGCs, but we also recorded from the SON to test for direct  
305 synaptic connectivity between the retina and the SON.

306

307 We crossed *GlyT2<sup>Cre</sup>* mice with a Cre-dependent ChR2<sup>EYFP</sup> reporter (Ai32; Jackson  
308 024109), which results in the expression of ChR2 in the axons and nerve terminals of  
309 SON-ipRGCs (Fig. 8a-e). Lateral SCN neurons were targeted in coronal slices (Fig. 8b).  
310 In cell-attached voltage clamp mode photo-stimulation activated robust action potential  
311 currents (APC), which demonstrates that the SCN neuron was depolarized beyond its  
312 action-potential threshold by the release of an excitatory transmitter. The amplitude and  
313 latency of APCs (Fig. 8h) were robust and fast, consistent with monosynaptic excitatory  
314 synaptic connections (Fig. 8g; (mean  $\pm$  SEM)  $7.2 \pm 0.5$  ms (range 6.3 – 8.2 ms) and  $193.7$   
315  $\pm 74.2$  pA (range 53.8 – 306.3 pA),  $n = 3$ ). In whole cell voltage clamp recordings we  
316 detected photo-stimulation evoked inward post-synaptic currents (PSCs) at holding  
317 potentials between -60 mV and -40 mV (Fig. 8f). The PSCs latency and amplitude were  
318  $6.7 \pm 0.2$  ms (range 6.3 – 7.4 ms) and  $35.2 \pm 10.0$  pA (range 15.4 – 71.3 pA),  $n = 5$ , Fig.  
319 8g, h. Similar excitatory synaptic input to SCN neurons was demonstrated by electrical

## A subtype of melanopsin ganglion cells encodes ground luminance

320 stimulation of the optic chiasm (Fig. 8b,f-h) which resulted in larger and faster PSCs (Fig.  
321 8 f,h). Pharmacological blockers were used to identify the neurotransmitter released by  
322 SON-ipRGCs. The glycine receptor antagonist strychnine (1  $\mu$ M) and the GABA<sub>A</sub>  
323 antagonist SR-95531 failed to inhibit photo-stimulation-induced PSCs (Fig. 8f,i). In  
324 contrast, PSCs were blocked by co-application of the selective AMPA and NMDA  
325 glutamate receptor antagonists CNQX (20  $\mu$ M) and AP-5 (50  $\mu$ M) (Fig. 8f,i,j). Similarly, in  
326 cell-attached mode, photo-stimulation-induced APCs were inhibited by co-application of  
327 CNQX and AP-5 (Fig. 8j). Together, these results are consistent with a model where SON-  
328 ipRGCs are excitatory and release glutamate onto SCN neurons.

329  
330 The whole-cell patch electrodes contained Neurobiotin and the location of recorded SCN  
331 neurons and their proximity to SON-ipRGC axon terminals was reconstructed with  
332 confocal microscopy. While only a small percentage of recordings resulted in photo-  
333 stimulation evoked PSCs, the locations of connected neurons were mapped to each slice  
334 by referencing infrared microscopy images taken of the living slice with the subsequent  
335 post-fixed confocal images (Fig. 8k). The locations of synaptically connected SCN  
336 neurons were consistent with anterograde and retrograde tracing experiments showing  
337 SON-ipRGC axon terminals resided in the *outer core* of the SCN (Fig. 5 & Fig. S3). Similar  
338 inward PSCs with a latency of  $5.72 \pm 0.13$  ms (range 5.56 – 5.98 ms, n = 3) and amplitude  
339 of  $64.7 \pm 7.1$  pA (range 55.9 – 78.9 pA, n = 3) which were not blocked by picrotoxin (50  
340  $\mu$ M) were recorded in voltage clamped SON neurons (Fig 8 i-o). Electric stimulation of  
341 the optic chiasm evoked PSCs in SON neurons confirming the retinal projection to this  
342 nucleus (latency  $2.6 \pm 0.2$  ms, amplitude  $215.8 \pm 50.1$  pA, n = 6).

343  
344 To determine if SON-ipRGCs might differentially release neurotransmitter at separate  
345 central locations, we performed whole-cell voltage-clamp recordings in the IGL in coronal  
346 slices made from *GlyT2<sup>Cre</sup>;Ai32* mice (Fig. 9a, b). To enhance chloride-mediated currents  
347 high chloride (65 mM CsCl<sup>-</sup>) internal solution was used, which changed the inhibitory  
348 reversal potential to -50 mV and allowed us to observe inward PSCs for both excitatory  
349 and inhibitory events. Photo-stimulation in the IGL resulted in mixed neurotransmitter  
350 release, with evidence for GABA, glycine, and glutamate release in our recordings (Fig.

## A subtype of melanopsin ganglion cells encodes ground luminance

351 9 c-g). Most photostimulation-evoked synaptic currents were stable in the presence of  
352 CNQX, and were strongly attenuated by strychnine, and completely abolished in a  
353 combination of CNQX, strychnine, and GABAazine (Fig. 9e-g). These results were  
354 seemingly in conflict with our SCN recordings and might suggest that SON-ipRGCs  
355 release inhibitory neurotransmitters in the IGL while releasing excitatory  
356 neurotransmitters in the SCN. However, the IGL receives inhibitory input from other  
357 central brain regions<sup>64</sup>, some of which may contain neurons labeled in the *GlyT2<sup>Cre</sup>* mouse  
358 line and may express ChR2 on the cell membrane in *GlyT2<sup>Cre</sup>;Ai32* mice.

359  
360 To determine whether photo-stimulation-evoked inhibitory PSCs in the IGL arise from  
361 non-retinal neurons, we restricted ChR2-expression to the retina with eye injections of  
362 Cre-dependent ChR2 in *GlyT2<sup>Cre</sup>* mice (Fig. 9h). After allowing 2 – 3 weeks for the ChR2  
363 to express, we recorded from the IGL, which was targeted in coronal slices with brief epi-  
364 fluorescent illumination to identify eGFP-expressing axon terminals, which form a dense  
365 band in the IGL (Fig. 19i - green). IGL neurons were filled with biocytin and recovered for  
366 confocal microscopy (Fig. 9j). Photo-stimulation evoked inward PSCs that were  
367 completely abolished with the bath application of the AMPAR antagonists CNQX and  
368 NBQX (Fig. 9k). These excitatory PSCs were on average smaller than evoked in  
369 recordings from *GlyT2<sup>Cre</sup>;Ai32<sup>ChR2:EYFP</sup>* mice, which may be due to viral expression of  
370 ChR2 being lower than expression driven by the *Ai32* line. To augment photostimulation-  
371 induced PSCs and rule out the possibility that inhibitory synaptic terminals need greater  
372 depolarization to reach the threshold required to activate transmitter release, we included  
373 K-channel blocker 4-aminopyridine (4-AP) in the ACSF and also included tetrodotoxin  
374 (TTX) to abolish poly-synaptic events. Despite 4-AP substantially increasing the light-  
375 evoked currents they were completely abolished by the co-application of CNQX (Fig. 9k).  
376 Thus, when ChR2 was expressed in the axon terminals of ipRGCs of *GlyT2<sup>Cre</sup>* or *OPN4<sup>Cre</sup>*  
377 mice, no evidence for inhibitory synaptic release was found. This suggests that inhibitory  
378 inputs to the IGL in *GlyT2<sup>Cre</sup>;Ai32* mice likely arise from central regions where neurons  
379 expressed ChR2 activated by light, and that SON-ipRGCs only release glutamate, but not  
380 GABA or glycine.

381

## A subtype of melanopsin ganglion cells encodes ground luminance

382

383

### 384 **Discussion**

#### 385 **Mosaic tiling and distribution**

386 In most retinal ganglion cell subtypes the fundamental organizing feature of retinal output  
387 is a mosaic, where the receptive field and corresponding dendritic fields of individual cells  
388 of the same subtype are arranged in territorial, regularly spaced grids<sup>43,65,66</sup>. Such  
389 arrangement leads to uniform coding of the visual scene across each retinal channel. This  
390 has remained unclear for ipRGCs, which overlap considerably, about 4-fold in the retina  
391 for the M1 ipRGCs<sup>29</sup>. As M1 ipRGCs participate primarily in non-image forming vision it  
392 is possible that spatial organization is deemphasized in favor of maximizing the area of  
393 photon capture<sup>67</sup>. Our results show that M1 ipRGCs can be further subdivided and  
394 comprise independent subtypes that tile retinal space, like many of the well-described  
395 conventional *bona fide* RGC subtypes<sup>25,66,68,69</sup>. Indeed the coverage factor of SON-  
396 ipRGCs is similar to the average coverage factor of most RGCs, identified from their  
397 functional receptive fields<sup>62</sup>. This indicates SON-ipRGCs are territorial and their dendrites  
398 overlap minimally. The functional significance of this arrangement is unclear, but it  
399 suggests surprisingly, that retinotopy might also be important for circadian biology<sup>70</sup>, and  
400 other non-image forming functions mediated by the SON.

401

402 Our mapping data illustrates that the increased density of ipRGCs in the dorsal retina<sup>3,41</sup>  
403 arises from an additional population of ipRGCs found only in this region. There are two  
404 pieces of evidence supporting this conclusion; (1) when SON-ipRGCs are subtracted from  
405 retinal density maps, the dorso-ventral density gradient disappears and the number of M1  
406 ipRGCs is equivalent in both hemispheres. (2) Retrograde labelling of SON-ipRGCs in  
407 OPN4Cre mice labels the same dorsal M1 ipRGCs as those localized in the GlyT2Cre  
408 mouse. These results suggest that there are at least 2 independent populations of M1  
409 ipRGCs in the dorsal retina, each with their own appropriate coverage factors. We  
410 estimate that SON-ipRGCs overlap ~twice, whereas the total population of M1 ipRGCs  
411 in the dorsal retina overlap ~5.5-fold. These values were calculated using the average  
412 dendritic diameter of Neurobiotin filled M1 ipRGCs in the *GlyT2Cre* mouse ( $d = 324 \mu\text{m}$ )

## A subtype of melanopsin ganglion cells encodes ground luminance

413 and are slightly larger than the dendritic diameter of M1 ipRGCs previously described (d  
414 = 274  $\mu\text{m}$ )<sup>29</sup>, resulting in slightly different coverage values (Fig. S7c). Though these  
415 differences are likely due to labeling technique, we cannot exclude the possibility that  
416 SON-ipRGCs have a different dendritic structure than neighboring M1 non-SON-  
417 ipRGCs). Currently it remains unclear if the ventral M1 ipRGCs belong to the same  
418 subtype of ipRGCs as those in the dorsal retina that overlap with the SON-ipRGCs. If the  
419 overlapping M1 ipRGCs follow the same spacing and distributions as the SON-ipRGCs,  
420 then there are at least two distinct subtypes of M1 ipRGCs in the rodent retina; one that  
421 is distributed across the entire retina and one that tiles the dorsal retina.

422

### 423 **Localized vision and photoreceptor organization**

424 The dorsal-only location of SON-ipRGCs suggests retinotopy at the level of the dorso-  
425 ventral axis is fundamental for some types of non-image forming vision. For the rodent,  
426 the horizon divides the visual scene into two distinct areas, consisting of differences in  
427 color, contrast, and behavioral relevance<sup>39</sup>. Accordingly, this is reflected in the  
428 asymmetric organization of cone photoreceptors across the dorso-ventral axis of rodent  
429 retina<sup>39,40</sup>. The higher density of UV-sensitive cones in the ventral retina enhances the  
430 dynamic range of photoreceptors for encoding the darker contrasts, which dominate the  
431 upper visual field and is likely important for predator detection<sup>39,43</sup>. Similarly, the dynamic  
432 range of the green cones that are in abundance in the dorsal retina is matched to encode  
433 the more even distribution of both light and dark contrasts found in the ventral visual field,  
434 likely aiding in navigation through foliage or burrows and finding small grains, grass and  
435 insects for consumption.

436

437 While rodent RGCs can form non-uniform topographic variations across the retina<sup>71</sup>,  
438 SON-ipRGCs are the first example of a RGC subtype restricted to a sub-region of retina.  
439 Strikingly, their location is almost identical to the region of dorsal retina that is low in UV-  
440 sensitive cones, suggesting ipRGCs and cone photoreceptors may have adapted  
441 similarly to encode information that is asymmetrically distributed in visual space. Non-  
442 image forming vision might also be adapted to encode the more uniform distribution of  
443 bright and dark contrasts, like cone photoreceptors. Alternatively, as the visual system of

## A subtype of melanopsin ganglion cells encodes ground luminance

444 the rodent is optimized for nocturnal vision, they might require additional processing  
445 power in night or daylight environment. Moon and starlight reflected off the ground is likely  
446 to predominate in nocturnal environments and reflected luminance might contain more  
447 useful information to drive the suppression of SON-mediated behaviors such as maternal  
448 activity or feeding<sup>72,73</sup>.

449

### 450 **Central projections and behavioral relevance**

451 There are currently six known types of ipRGCs (M1–M6), primarily distinguished by their  
452 morphology<sup>6,12</sup>. However, recent evidence suggests additional functional subtypes likely  
453 exist within this current organization<sup>10,16,18,22,36,63,74</sup>. How do these additional ipRGC  
454 subtypes fit with our current understanding of M1 ipRGCs? Some ipRGCs do not express  
455 the transcription factor Brn3b and this small number of ipRGCs projects to the SCN and  
456 IGL only, avoiding other brain regions<sup>18</sup>. Our results suggest that a separate tiling  
457 subpopulation of M1 ipRGCs co-innervate the SON, the outer core of the SCN and the  
458 IGL, likely performing distinct behavioral functions.

459

460 The SON is a collection of secretory cells that participate in the hypothalamic-pituitary-  
461 adrenal axis by producing antidiuretic hormone (ADH) and oxytocin. ADH is responsible  
462 for regulating water reabsorption in the kidneys<sup>75</sup> and oxytocin plays a critical role in  
463 lactation and parturition<sup>76</sup>. The significance of visual input to this area via the SON-  
464 ipRGCs is unclear but circadian changes in urine volume and concentration<sup>77,78</sup>, as well  
465 as patterns of lactation<sup>79,80</sup> are well established in humans and animal models. Like the  
466 influence of ipRGCs on entrainment of the SCN, bright light might act as a Zeitgeber in  
467 the SON, keeping the daily release of AVP well-timed or to aid in adjusting fluid balance  
468 to altered light cycles, such as when changing time zones. Alternatively, ipRGCs that  
469 innervate the SON might be involved in more direct effects of light on the release of AVP  
470 or oxytocin by SON neurons. It is also possible that SON-ipRGCs regulate the release of  
471 oxytocin, AVP, or other neuropeptides such as cholecystikinin, or CART, throughout the  
472 brain, rather than in the pituitary, where SON ipRGCs might be important for regulating  
473 direct light-activated influence on maternal behaviors, or feeding<sup>81</sup>. Future studies of sex  
474 differences in these pathways will be interesting in this regard.

## A subtype of melanopsin ganglion cells encodes ground luminance

475  
476 Separate ipRGC populations influence both the circadian and direct effect of light on body  
477 temperature<sup>10</sup>. It is possible that innervation to the SON functions similarly, acting as a  
478 synchronizer of different SON-mediated behaviors over shorter timescales than those  
479 governed by the SCN. The peptide pituitary adenylate cyclase-activating polypeptide  
480 (PACAP) is present in a dorsal population of ipRGCs in the rat<sup>41</sup> and both PACAP and  
481 the PACAP receptor PAC<sub>1</sub> are expressed in the SON<sup>82,83</sup>. Additionally, PACAP positive  
482 retinal hypothalamic tract terminals are localized to a SCN region that resembles the  
483 outer-core projections of SON ipRGCs. Thus SON ipRGCs are likely the PACAP-  
484 containing ipRGCs described in rat retina but further studies are required to specifically  
485 determine this.

486  
487 The unique innervation of SON-ipRGCs to known circadian structures (SCN and IGL) is  
488 also of significant interest. Oscillatory activity in the SCN functions as a circadian timing  
489 circuit, predicting physiological and behavioral needs throughout the day and night<sup>84</sup>. The  
490 SCN is divided into two distinct subdivisions, designated as core and shell based primarily  
491 on localized peptidergic expression, innervation, and projection<sup>85</sup>. The core is the site of  
492 direct visual input from ipRGCs, indirect visual input from IGL, and is localized by the  
493 expression of vasoactive intestinal polypeptide (VIP) and gastrin releasing peptide  
494 (GRP)<sup>44</sup>. Alternatively, the SCN shell contains a large number of AVP neurons and  
495 receives innervation from other CNS nuclei<sup>44,86</sup>. Our results show that SON-ipRGCs  
496 innervate a localized region of the SCN we call the outer core, avoiding the central core  
497 of primary ipRGC input and the AVP neurons that comprise the SCN shell. As SON-  
498 ipRGCs represent a distinct subtype of ipRGC it suggests that the SCN receives at least  
499 two types of direct retinal input, segregated to at least two localized areas of the SCN.  
500 The behavioral relevance of this organization is unclear but given the localized distribution  
501 of SON-ipRGCs in the retina, and their overlap with other M1 ipRGCs, it suggests that  
502 subtypes may be encoding different aspects of environmental light. Given their broad  
503 projections to the SCN, IGL, SON and other regions, and the limited knowledge of their  
504 specific connectivity within the SON, behavioral analysis of the specific functional role of



## A subtype of melanopsin ganglion cells encodes ground luminance

505 this unique subtype would require surveying many behaviors that might rely on subtle  
506 inputs from SON-ipRGCs.

507

### 508 **Neurotransmitter release**

509 Why are there ipRGCs labeled in the *GlyT2<sup>Cre</sup>* line, which, other than ipRGCs, labels  
510 predominantly glycinergic amacrine cells in the retina? This question is particularly  
511 prescient given the recent discovery of GABAergic ipRGCs that project to the SCN, IGL  
512 and OPN<sup>63</sup>. Our results, however, indicate that SON-ipRGCs do not release GABA, and  
513 thus must form a separate population from GABAergic ipRGCs. It remains unclear if they  
514 express the *GlyT2* transporter in their axon terminals, and if they do, what functional role  
515 the transporter might play in modulating central synapses. It is possible that SON-ipRGCs  
516 release glycine to modulate the glycine binding site on post-synaptic NMDA receptors  
517 however there is no evidence of synaptic release of glycine in the SCN because  
518 spontaneous glycinergic IPSCs were not present and glycine does not contribute to the  
519 tonic current as strychnine did not alter the baseline of SCN neurons<sup>87</sup>. Alternatively their  
520 labelling in *GlyT2<sup>Cre</sup>* mice may be some other function of the bacterial artificial  
521 chromosome (BAC) insertion in this particular transgenic line. Indeed, other BAC lines,  
522 like the *HB9<sup>GFP</sup>* line that labels ON-OFF direction selective ganglion cells, reflect the  
523 genomic insertion site of the BAC<sup>88</sup>. The BAC maps to chromosome 12 rather than the  
524 endogenous location of chromosome 7. Regardless, our anatomical mapping data  
525 predicts there are likely only two subtypes of ipRGCs in the dorsal retina, if other ipRGCs  
526 follow similar mosaic spacing rules as SON-ipRGCs. While we do not know if GABAergic  
527 ipRGCs are M1 ipRGCs, their projections to the SCN strongly suggest some of them are,  
528 whereas their projections to the shell of the LGN might indicate some are not ipRGCs<sup>63</sup>.  
529 Given they are more numerous in the dorsal retina, it remains unclear if they are the other  
530 subtype we predict to lie in the dorsal retina or, instead, they might be part of multiple  
531 subtypes of ipRGCs that do not form complete mosaics throughout the retina. Future  
532 studies of both retrograde tracing of these populations and functional recording from  
533 ipRGCs in the retina and brain are required to resolve these questions.

534

### 535 **Methods**

## A subtype of melanopsin ganglion cells encodes ground luminance

### 536 **Animals**

537 Experiments involving animals were in accordance with the National Institutes of Health  
538 guidelines, and all procedures were approved by the Oregon Health and Science  
539 University Institutional Animal Care and Use Committee. *GlyT2<sup>Cre</sup>* mice (Tg(Slc6a5-  
540 cre)KF109Gsat/Mmucd) were a gift from Larry Trussell, prior to being cryo-recovered by  
541 the OHSU Transgenic Mouse Model Core using sperm purchased from the Mutant Mouse  
542 Resource and Research Center (Stock 030730-UCD). Ai32 (RCL-ChR2(H134R)/EYFP),  
543 Ai9 (RCL-tdT), and *Ai140* (TITL-GCF-ICL-tTA2) mice were obtained from The Jackson  
544 Laboratories. *OPN4<sup>Cre</sup>* (tm1.1(cre)Saha/J) were a gift from Samer Hattar and The Johns  
545 Hopkins University. Animals were bread and housed on a 12-h light/dark cycle with food  
546 and water ad libitum.

547

### 548 **Eye and brain injections**

549 To trace ipRGC projections and sites of central innervation, anterograde tracers were  
550 delivered in the eye through intravitreal injection. AAV-FLEX-tdTomato (Catalog# 28306  
551 AAV2 & PHPeB; 2  $\mu$ l per eye at  $1 \times 10^{13}$  vg mL<sup>-1</sup>) and AAV1-DF-ChR2-mcherry (Catalog#  
552 18916) were purchased through Addgene. For this procedure, animals were anesthetized  
553 by intraperitoneal injection of 100mg/kg ketamine, 15mg/kg xylazine. Proparacaine  
554 (anesthetic) and tropicamide (anticholinergic) drops were applied topically to the eye for  
555 local anesthesia and to improve visualization of the surgical field, respectively. Under  
556 stereo microscopic control, a small hole was made at the ora serrata using a 32G needle.  
557 AAV vectors containing  $\sim 10^{13}$ - $10^{14}$  viral genomes were delivered in 1.5  $\mu$ L volumes to the  
558 vitreous of the eye using a 5  $\mu$ L Hamilton microinjection syringe. Animals were allowed to  
559 recover from anesthetic on a heat pad before being returned to their cage. AAV injections  
560 were performed between p30–p60. To aid in visualizing retino-recipient brain structures  
561 animals also received a follow up eye injection of 1uL CTB-488 one week before sacrifice.  
562 In order to identify ipRGCs that innervate specific central locations, stereotactic brain  
563 injections of retrograde tracers were performed using a Kopf stereotactic instrument. For  
564 the supraoptic nucleus (SON), 92nL of AAVRG-DF-ChR2-mcherry (Catalog# 18916) was  
565 injected bisymmetrically at 0.5mm from Bregma, +1.3mm lateral to the midline at a depth

## A subtype of melanopsin ganglion cells encodes ground luminance

566 of 5.0mm, determined from the Franklin & Paxinos Mouse Brain Coordinate Atlas, 4th ed.  
567 Animals were sacrificed three-four weeks following injections for brain and eye histology.

568

### 569 **Tissue preparation and immunohistochemistry**

570 For retina histology, animals were euthanized with 200mg/kg ketamine and 30mg/kg  
571 xylazine followed by cervical dislocation. Eyes were then removed with curved surgical  
572 scissors and placed in 4% paraformaldehyde (PFA) (Electron Microscopy Sciences  
573 Catalog#: IC993M31) in phosphate buffered saline (PBS) for 30 mins with the cornea  
574 partially removed. Eyes were then washed thoroughly in PBS for 24hrs. To dissect the  
575 retina from the eye, the lens and tissue up to the trabecular meshwork was removed  
576 leaving an exposed globe. Dorsal ventral orientation, marked with a ventral cut, was  
577 established using the choroid fissures and retinal artery, which can be visualized entering  
578 the caudal portion of the sclera, inferior to the optic nerve. The retina was then separated  
579 from the sclera by cutting along the rim of retinal attachment and transecting the optic  
580 nerve from its scleral bed. Whole retina was then transferred to a 1.5ml Eppendorf tube  
581 for immunohistochemistry. The details, including the timing and concentration of primary  
582 and secondary antibody used for specific experiments are described in Table 1. Once  
583 immunostaining was complete, 3 additional relieving cuts were made at cardinal positions  
584 to allow the whole retina to be flat-mounted RGC side up on glass slides. Retinas were  
585 dried on the slide until transparent, then mounted with a coverslip using Vectashield  
586 mounting medium.

587

588 For brain histology, animals were heavily anesthetized by IP injection of  
589 ketamine/xylazine and transcardially perfused with 50 $\mu$ L Heparin + 30 mL PBS followed  
590 by 40mL 4% PFA in PBS. Brains were removed and post-fixed in 4% PFA 2-4 hrs. Brains  
591 were then washed thoroughly in PBS for 24hrs, mounted in 4% agar and sectioned at  
592 200 $\mu$ m from rostral to caudal using a Leica VT1000 S vibratome. Sections were collected  
593 in PBS and transferred to glass slides. Retinas and brain slices were immuno-stained in  
594 a mixture of 5% Donkey serum, 0.5% Triton-X 100 and 0.25 % sodium azide at room  
595 temperature. Details, including the timing and concentration of primary and secondary  
596 antibodies used for specific experiments are described in Table 1. Both brain slice and

## A subtype of melanopsin ganglion cells encodes ground luminance

597 whole-mount retina were mounted using Vectashield mounting medium (Vector  
598 laboratories) and imaged on a Leica SP8 scanning confocal microscope.

599

### 600 **Quantification of retina histology**

601 To generate retina maps, whole retina tiling confocal z-stacks were captured using Leica  
602 SP8 confocal microscope using a 40x oil objective. Tiles were stitched together in Leica  
603 LAS X Life Sciences software and analyzed in ImageJ. ipRGCs were manually identified  
604 across the entire retina by systematically localizing all melanopsin positive cell bodies in  
605 200 x 200  $\mu\text{m}$  square increments. Somas were marked as regions of interest (ROI) in a  
606 separate overlay image using the multipoint tool in imageJ (2d axis image). M1 ipRGCs  
607 were identified by their characteristic dendritic stratification in the OFF sublamina, their  
608 small somas, and bright melanopsin staining. *GlyT2<sup>Cre</sup>* ipRGCs were identified by the co-  
609 localization of GFP and melanopsin in their cell bodies (*GlyT2<sup>Cre</sup>;Ai140*). Distribution  
610 maps of ipRGCs were generated from the x/y coordinates extracted from the axis image.  
611 Due to their abundance, UV cone distribution maps were generated using the trainable  
612 Weka segmentation plugin for imageJ <sup>89</sup> ([imagej.net/plugins/tws/](http://imagej.net/plugins/tws/)). This machine learning  
613 software allows structures of similar appearance to be identified in a semi-automated  
614 manner. Images were processed with a binary threshold and segmentation was trained  
615 to identify fluorescent cells (UV+ cone outer segments) in the photoreceptor layer.  
616 Segmentation can be challenging when the proximity of cells is small or overlapping. As  
617 a result, the density of UV cones reported in the ventral retina is likely an underestimate.  
618

619 Neighbor density maps and density recovery profiles were generated using the Neighbor  
620 density analysis application within the BioVoxel\_Toolbox plugin for ImageJ  
621 ([imagej.net/plugins/biovoxxel-toolbox](http://imagej.net/plugins/biovoxxel-toolbox)). Axis images denoting cell bodies were converted  
622 to 8-bit and applied with a binary threshold. Particle neighbor analysis was used to identify  
623 the number of cell bodies within a given radius from each soma. Neighbor density maps  
624 were generated with density radius of 110 $\mu\text{m}$  to approximate the average dendritic  
625 diameter of RGCs. Density recovery profiles were calculated similarly using radii from 0  
626 to 400  $\mu\text{m}$  in 20  $\mu\text{m}$  increments. Population per hemisphere were calculated by dividing  
627 oriented retinas through the optic nerve head along the naso-temporal axis and

## A subtype of melanopsin ganglion cells encodes ground luminance

628 quantifying # of cells per hemisphere. Density of cells per mm<sup>2</sup> was determined by  
629 quantifying the number of cells within 1 mm<sup>2</sup> areas of dorsal and ventral retina.

630

### 631 **Single cell patch clamp recordings in the retina**

632 Single cell current-clamp recordings were performed in the *GlyT2<sup>Cre</sup>;Ai9* mouse using a  
633 HEKA EPC800 amplifier, ITC-18 digitizer and Axograph software. Fluorescent ipRGCs  
634 were targeted using brief 554 nm exposure (<100 ms) and a high sensitivity camera  
635 (Andor technologies – DU-888E-COO-#BV). Recordings were performed in Ames  
636 medium with synaptic blockers 20 μM L-AP4, 25 μM DAP5, 20 μM CNQX to isolate  
637 ipRGCs. Five second illumination of blue (445 nm) light was used to elicit intrinsic  
638 melanopsin responses at 5x10<sup>13</sup> log photons cm<sup>-2</sup> s<sup>-1</sup> using a Texas Instruments DLP4500  
639 LightCrafter projector and custom software (pyStim<sup>90</sup>). Some ipRGCs were targeted for  
640 Neurobiotin electroporation using methods described previously<sup>91,92</sup>

641

### 642 **Single cell patch clamp recordings monitoring synaptic release in the brain**

643 To study synaptic transmission mediated by the axons of SON-ipRGCs, *GlyT2<sup>Cre</sup>* mice  
644 were crossed with the Ai32 reporter mouse driving channelrodopsin expression in Cre  
645 expressing ipRGCs. Male and female *GlyT2<sup>Cre</sup>;Ai32* mice were housed in an  
646 environmental chamber (Percival Scientific, Perry, IA) maintained at 20 - 21 °C on a 12:12  
647 hr light:dark (LD) cycle, with free access to food and water. The ChR2 expressing axonal  
648 terminals projecting to the SCN were activated by white light passing through a Chroma  
649 excitation filter (BP 470/40). The estimated intensity of the light was 16.5 to 17 log photons  
650 cm<sup>-2</sup> s<sup>-1</sup>. The ChR2 expressing RHT projection were observed using YFP filter (Chroma,  
651 ET-EYFP C212572, Cat.# 49003). The recordings were performed at the end of the day  
652 and the beginning of the night. SCN neurons were voltage-clamped in the whole-cell and  
653 cell-attached patch clamp modes. The cells were filled with Neurobiotin (0.5%), which  
654 made it possible to determine their localization after the experiment. The internal solution  
655 consisted of (in mM): 87 CH<sub>3</sub>O<sub>3</sub>SCs, 15 CsCl, 1 CaCl<sub>2</sub>, 10 HEPES, 11 EGTA, 31.5 CsOH,  
656 3 MgATP, 0.3 TrisGTP, 10 Phosphocreatine di(tris) salt and 5 N-(2,6-  
657 dimethylphenylcarbamoylmethyl)triethylammonium chloride (QX-314); pH 7.25, 278  
658 mOsm. The extracellular recording solution (ACSF) was (in mM): 132.5 NaCl, 2.5 KCl,

## A subtype of melanopsin ganglion cells encodes ground luminance

659 1.2 NaH<sub>2</sub>PO<sub>4</sub>, 2.4 CaCl<sub>2</sub>, 1.2 MgCl<sub>2</sub>, 11 glucose, and 22 NaHCO<sub>3</sub>, saturated with 95%  
660 O<sub>2</sub> and 5% CO<sub>2</sub>; pH 7.3–7.4, 300–305 mOsm. The equilibrium potential for chloride was  
661 -50 mV. For extended detail see Moldavan et al., 2010<sup>93</sup>; 2018<sup>94</sup>. During recordings the  
662 inhibitors of glycine, GABA<sub>A</sub>, and ionotropic glutamate receptors, respectively strychnine  
663 (1 μM), gabazine (10 μM), CNQX (20 μM) + AP-5 (DL-AP5, 50 μM), and TTX (1 μM) an  
664 inhibitor of voltage-dependent Na<sup>+</sup> currents were applied. EPSCs evoked by electric  
665 stimulation of the optic chiasm were also used in order to confirm the recorded cell  
666 received retinal inputs.

667

### 668 **Contributions**

669 M.H.B, M.M, M.A.M, T.G, O.C, E.W., C.A, HvG and B.S designed and performed  
670 experiments and analyzed data, with input from K.W. Confocal microscopy and analysis  
671 was performed by M.H.B and B.S., retina patch clamp recordings and dye filling and eye  
672 injections were performed by M.H.B, brain injections were performed by O.C., brain slice  
673 recordings and optogenetics were performed by M.M, M.A.M, and T.G with help from  
674 M.H.B. The manuscript was written by M.H.B and B.S with input from all authors.

675

### 676 **Acknowledgments**

677 We would like to thank Alex Tomlinson for help with pyStim, Andre Dagostin help with  
678 mouse husbandry and pilot experiments, Lane Brown for help obtaining *OPN4<sup>Cre</sup>* mice,  
679 and Joseph Leffler and David Vaney, and Phyllis Robinson for critically reading the  
680 manuscript. This work was supported by EY032564, Lloyd Research Fund, Medical  
681 Research Fund of Oregon New Investigator grant P30 EY010572 and unrestricted  
682 departmental funding from Research to Prevent Blindness (New York, NY) to BS,  
683 NS103842 to CAN, EY031984 to MHB, EY032057 to KW, and acknowledgement is made  
684 to the donors of National Glaucoma Research, a program of BrightFocus Foundation, for  
685 support of this research.

686

## A subtype of melanopsin ganglion cells encodes ground luminance

687

### 688 **References**

689

- 690 1 Güler, A. D. *et al.* Melanopsin cells are the principal conduits for rod–cone input to non-  
691 image-forming vision. *Nature* **453**, 102-105, doi:10.1038/nature06829 (2008).
- 692 2 Hatori, M. *et al.* Inducible Ablation of Melanopsin-Expressing Retinal Ganglion Cells  
693 Reveals Their Central Role in Non-Image Forming Visual Responses. *PLOS ONE* **3**,  
694 e2451, doi:10.1371/journal.pone.0002451 (2008).
- 695 3 Hattar, S., Liao, H. W., Takao, M., Berson, D. M. & Yau, K. W. Melanopsin-containing  
696 retinal ganglion cells: architecture, projections, and intrinsic photosensitivity. *Science* **295**,  
697 1065-1070, doi:10.1126/science.1069609 (2002).
- 698 4 Hattar, S. *et al.* Central projections of melanopsin-expressing retinal ganglion cells in the  
699 mouse. *The Journal of comparative neurology* **497**, 326-349, doi:10.1002/cne.20970  
700 (2006).
- 701 5 Do, M. T. H. Melanopsin and the Intrinsically Photosensitive Retinal Ganglion Cells:  
702 Biophysics to Behavior. *Neuron* **104**, 205-226, doi:10.1016/j.neuron.2019.07.016 (2019).
- 703 6 Aranda, M. L. & Schmidt, T. M. Diversity of intrinsically photosensitive retinal ganglion  
704 cells: circuits and functions. *Cell Mol Life Sci* **78**, 889-907, doi:10.1007/s00018-020-  
705 03641-5 (2021).
- 706 7 Berson, D. M., Dunn, F. A. & Takao, M. Phototransduction by retinal ganglion cells that  
707 set the circadian clock. *Science* **295**, 1070-1073, doi:10.1126/science.1067262 (2002).
- 708 8 Hattar, S. *et al.* Melanopsin and rod-cone photoreceptive systems account for all major  
709 accessory visual functions in mice. *Nature* **424**, 76-81, doi:10.1038/nature01761 (2003).
- 710 9 Panda, S. *et al.* Melanopsin (Opn4) requirement for normal light-induced circadian phase  
711 shifting. *Science* **298**, 2213-2216, doi:10.1126/science.1076848 (2002).
- 712 10 Rupp, A. C. *et al.* Distinct ipRGC subpopulations mediate light's acute and circadian effects  
713 on body temperature and sleep. *Elife* **8**, doi:10.7554/eLife.44358 (2019).
- 714 11 Fernandez, D. C. *et al.* Light Affects Mood and Learning through Distinct Retina-Brain  
715 Pathways. *Cell* **175**, 71-84.e18, doi:10.1016/j.cell.2018.08.004 (2018).
- 716 12 Sondereker, K. B., Stabio, M. E. & Renna, J. M. Crosstalk: The diversity of melanopsin  
717 ganglion cell types has begun to challenge the canonical divide between image-forming  
718 and non-image-forming vision. *J Comp Neurol* **528**, 2044-2067, doi:10.1002/cne.24873  
719 (2020).
- 720 13 Ebihara, S. & Tsuji, K. Entrainment of the circadian activity rhythm to the light cycle:  
721 effective light intensity for a Zeitgeber in the retinal degenerate C3H mouse and the normal  
722 C57BL mouse. *Physiol Behav* **24**, 523-527, doi:10.1016/0031-9384(80)90246-2 (1980).
- 723 14 Freedman, M. S. *et al.* Regulation of mammalian circadian behavior by non-rod, non-cone,  
724 ocular photoreceptors. *Science* **284**, 502-504, doi:10.1126/science.284.5413.502 (1999).
- 725 15 Hattar, S. *et al.* Central projections of melanopsin-expressing retinal ganglion cells in the  
726 mouse. *J Comp Neurol* **497**, 326-349, doi:10.1002/cne.20970 (2006).
- 727 16 Li, J. Y. & Schmidt, T. M. Divergent projection patterns of M1 ipRGC subtypes. *J Comp*  
728 *Neurol* **526**, 2010-2018, doi:10.1002/cne.24469 (2018).
- 729 17 Lucas, R. J. *et al.* Diminished pupillary light reflex at high irradiances in melanopsin-  
730 knockout mice. *Science* **299**, 245-247, doi:10.1126/science.1077293 (2003).

## A subtype of melanopsin ganglion cells encodes ground luminance

- 731 18 Chen, S. K., Badea, T. C. & Hattar, S. Photoentrainment and pupillary light reflex are  
732 mediated by distinct populations of ipRGCs. *Nature* **476**, 92-95, doi:10.1038/nature10206  
733 (2011).
- 734 19 Zhao, X., Stafford, B. K., Godin, A. L., King, W. M. & Wong, K. Y. Photoresponse  
735 diversity among the five types of intrinsically photosensitive retinal ganglion cells. *The*  
736 *Journal of physiology* **592**, 1619-1636, doi:10.1113/jphysiol.2013.262782 (2014).
- 737 20 Keenan, W. T. *et al.* A visual circuit uses complementary mechanisms to support transient  
738 and sustained pupil constriction. *Elife* **5**, doi:10.7554/eLife.15392 (2016).
- 739 21 Lall, G. S. *et al.* Distinct contributions of rod, cone, and melanopsin photoreceptors to  
740 encoding irradiance. *Neuron* **66**, 417-428, doi:10.1016/j.neuron.2010.04.037 (2010).
- 741 22 Emanuel, A. J., Kapur, K. & Do, M. T. H. Biophysical Variation within the M1 Type of  
742 Ganglion Cell Photoreceptor. *Cell Rep* **21**, 1048-1062, doi:10.1016/j.celrep.2017.09.095  
743 (2017).
- 744 23 Milner, E. S. & Do, M. T. H. A Population Representation of Absolute Light Intensity in  
745 the Mammalian Retina. *Cell* **171**, 865-876.e816, doi:10.1016/j.cell.2017.09.005 (2017).
- 746 24 Dacey, D. M. The mosaic of midget ganglion cells in the human retina. *J Neurosci* **13**,  
747 5334-5355, doi:10.1523/jneurosci.13-12-05334.1993 (1993).
- 748 25 Vaney, D. I. Territorial organization of direction-selective ganglion cells in rabbit retina. *J*  
749 *Neurosci* **14**, 6301-6316, doi:10.1523/jneurosci.14-11-06301.1994 (1994).
- 750 26 Wassle, H. & Riemann, H. J. The mosaic of nerve cells in the mammalian retina. *Proc R*  
751 *Soc Lond B Biol Sci* **200**, 441-461, doi:10.1098/rspb.1978.0026 (1978).
- 752 27 Masland, R. H. The neuronal organization of the retina. *Neuron* **76**, 266-280,  
753 doi:10.1016/j.neuron.2012.10.002 (2012).
- 754 28 Wassle, H. Parallel processing in the mammalian retina. *Nat Rev Neurosci* **5**, 747-757,  
755 doi:10.1038/nrn1497 (2004).
- 756 29 Berson, D. M., Castrucci, A. M. & Provencio, I. Morphology and mosaics of melanopsin-  
757 expressing retinal ganglion cell types in mice. *The Journal of comparative neurology* **518**,  
758 2405-2422, doi:10.1002/cne.22381 (2010).
- 759 30 The Gene Expression Nervous System Atlas (GENSAT) Project, T. R. U. N. Y., NY). MGI  
760 download of GENSAT transgene data. *Database Download* (2005).
- 761 31 Ishihara, N., Armsen, W., Papadopoulos, T., Betz, H. & Eulenburg, V. Generation of a  
762 mouse line expressing Cre recombinase in glycinergic interneurons. *Genesis* **48**, 437-445,  
763 doi:10.1002/dvg.20640 (2010).
- 764 32 Eulenburg, V. *et al.* GlyT1 determines the glycinergic phenotype of amacrine cells in the  
765 mouse retina. *Brain Struct Funct* **223**, 3251-3266, doi:10.1007/s00429-018-1684-3 (2018).
- 766 33 Schmidt, T. M., Chen, S. K. & Hattar, S. Intrinsically photosensitive retinal ganglion cells:  
767 many subtypes, diverse functions. *Trends Neurosci* **34**, 572-580,  
768 doi:10.1016/j.tins.2011.07.001 (2011).
- 769 34 Schmidt, T. M. & Kofuji, P. Functional and morphological differences among intrinsically  
770 photosensitive retinal ganglion cells. *J Neurosci* **29**, 476-482, doi:10.1523/jneurosci.4117-  
771 08.2009 (2009).
- 772 35 Schmidt, T. M. & Kofuji, P. Differential cone pathway influence on intrinsically  
773 photosensitive retinal ganglion cell subtypes. *J Neurosci* **30**, 16262-16271,  
774 doi:10.1523/jneurosci.3656-10.2010 (2010).



## A subtype of melanopsin ganglion cells encodes ground luminance

- 775 36 Schmidt, T. M. & Kofuji, P. Structure and function of bistratified intrinsically  
776 photosensitive retinal ganglion cells in the mouse. *Journal of Comparative Neurology* **519**,  
777 1492-1504, doi:10.1002/cne.22579 (2011).
- 778 37 Sonoda, T., Okabe, Y. & Schmidt, T. M. Overlapping morphological and functional  
779 properties between M4 and M5 intrinsically photosensitive retinal ganglion cells. *The*  
780 *Journal of comparative neurology* **528**, 1028-1040, doi:10.1002/cne.24806 (2020).
- 781 38 Estevez, M. E. *et al.* Form and function of the M4 cell, an intrinsically photosensitive  
782 retinal ganglion cell type contributing to geniculocortical vision. *J Neurosci* **32**, 13608-  
783 13620, doi:10.1523/JNEUROSCI.1422-12.2012 (2012).
- 784 39 Baden, T. *et al.* A tale of two retinal domains: near-optimal sampling of achromatic  
785 contrasts in natural scenes through asymmetric photoreceptor distribution. *Neuron* **80**,  
786 1206-1217, doi:10.1016/j.neuron.2013.09.030 (2013).
- 787 40 Szel, A. *et al.* Unique topographic separation of two spectral classes of cones in the mouse  
788 retina. *Journal of Comparative Neurology* **325**, 327-342 (1992).
- 789 41 Hannibal, J., Hindersson, P., Knudsen, S. M., Georg, B. & Fahrenkrug, J. The  
790 photopigment melanopsin is exclusively present in pituitary adenylate cyclase-activating  
791 polypeptide-containing retinal ganglion cells of the retinohypothalamic tract. *J Neurosci*  
792 **22**, RC191 (2002).
- 793 42 Hughes, S., Watson, Thomas S., Foster, Russell G., Peirson, Stuart N. & Hankins,  
794 Mark W. Nonuniform Distribution and Spectral Tuning of Photosensitive Retinal Ganglion  
795 Cells of the Mouse Retina. *Current Biology* **23**, 1696-1701, doi:10.1016/j.cub.2013.07.010  
796 (2013).
- 797 43 Heukamp, A. S., Warwick, R. A. & Rivlin-Etzion, M. Topographic Variations in Retinal  
798 Encoding of Visual Space. *Annu Rev Vis Sci*, doi:10.1146/annurev-vision-121219-081831  
799 (2020).
- 800 44 Abrahamson, E. E. & Moore, R. Y. Suprachiasmatic nucleus in the mouse: retinal  
801 innervation, intrinsic organization and efferent projections. *Brain Res* **916**, 172-191,  
802 doi:10.1016/s0006-8993(01)02890-6 (2001).
- 803 45 Moore, R. Y., Speh, J. C. & Leak, R. K. Suprachiasmatic nucleus organization. *Cell Tissue*  
804 *Res* **309**, 89-98, doi:10.1007/s00441-002-0575-2 (2002).
- 805 46 Antle, M. C. & Silver, R. Orchestrating time: arrangements of the brain circadian clock.  
806 *Trends Neurosci* **28**, 145-151, doi:10.1016/j.tins.2005.01.003 (2005).
- 807 47 Yan, L. *et al.* Exploring spatiotemporal organization of SCN circuits. *Cold Spring Harb*  
808 *Symp Quant Biol* **72**, 527-541, doi:10.1101/sqb.2007.72.037 (2007).
- 809 48 Varadarajan, S. *et al.* Connectome of the Suprachiasmatic Nucleus: New Evidence of the  
810 Core-Shell Relationship. *eNeuro* **5**, doi:10.1523/eneuro.0205-18.2018 (2018).
- 811 49 Wen, S. *et al.* Spatiotemporal single-cell analysis of gene expression in the mouse  
812 suprachiasmatic nucleus. *Nat Neurosci* **23**, 456-467, doi:10.1038/s41593-020-0586-x  
813 (2020).
- 814 50 Rothhaas, R. & Chung, S. Role of the Preoptic Area in Sleep and Thermoregulation.  
815 *Frontiers in Neuroscience* **15**, doi:10.3389/fnins.2021.664781 (2021).
- 816 51 Delville, Y., De Vries, G. J. & Ferris, C. F. Neural connections of the anterior  
817 hypothalamus and agonistic behavior in golden hamsters. *Brain Behav Evol* **55**, 53-76,  
818 doi:10.1159/000006642 (2000).

## A subtype of melanopsin ganglion cells encodes ground luminance

- 819 52 Ricci, L. A., Schwartz, J. J. & Melloni, R. H., Jr. Alterations in the anterior hypothalamic  
820 dopamine system in aggressive adolescent AAS-treated hamsters. *Horm Behav* **55**, 348-  
821 355, doi:10.1016/j.yhbeh.2008.10.011 (2009).
- 822 53 Melloni, R. H., Jr. & Ricci, L. A. Adolescent exposure to anabolic/androgenic steroids and  
823 the neurobiology of offensive aggression: a hypothalamic neural model based on findings  
824 in pubertal Syrian hamsters. *Horm Behav* **58**, 177-191, doi:10.1016/j.yhbeh.2009.11.002  
825 (2010).
- 826 54 Zimmerman, C. A., Leib, D. E. & Knight, Z. A. Neural circuits underlying thirst and fluid  
827 homeostasis. *Nature reviews. Neuroscience* **18**, 459-469, doi:10.1038/nrn.2017.71 (2017).
- 828 55 Biran, J., Tahor, M., Wircer, E. & Levkowitz, G. Role of developmental factors in  
829 hypothalamic function. *Front Neuroanat* **9**, 47-47, doi:10.3389/fnana.2015.00047 (2015).
- 830 56 Song, Z., Levin, B. E., Stevens, W. & Sladek, C. D. Supraoptic oxytocin and vasopressin  
831 neurons function as glucose and metabolic sensors. *Am J Physiol Regul Integr Comp*  
832 *Physiol* **306**, R447-456, doi:10.1152/ajpregu.00520.2013 (2014).
- 833 57 Sabatier, N., Leng, G. & Menzies, J. Oxytocin, feeding, and satiety. *Front Endocrinol*  
834 *(Lausanne)* **4**, 35-35, doi:10.3389/fendo.2013.00035 (2013).
- 835 58 Armstrong, W. E. & Stern, J. E. Electrophysiological and morphological characteristics of  
836 neurons in perinuclear zone of supraoptic nucleus. *Journal of neurophysiology* **78**, 2427-  
837 2437, doi:10.1152/jn.1997.78.5.2427 (1997).
- 838 59 Ecker, J. L. *et al.* Melanopsin-Expressing Retinal Ganglion-Cell Photoreceptors: Cellular  
839 Diversity and Role in Pattern Vision. *Neuron* **67**, 49-60,  
840 doi:<https://doi.org/10.1016/j.neuron.2010.05.023> (2010).
- 841 60 Rodieck, R. W. The density recovery profile: A method for the analysis of points in the  
842 plane applicable to retinal studies. *Visual neuroscience* **6**, 95-111,  
843 doi:10.1017/S095252380001049X (1991).
- 844 61 Zhang, Y., Kim, I. J., Sanes, J. R. & Meister, M. The most numerous ganglion cell type of  
845 the mouse retina is a selective feature detector. *Proc Natl Acad Sci USA* **109**, E2391-2398,  
846 doi:10.1073/pnas.1211547109 (2012).
- 847 62 Baden, T. *et al.* The functional diversity of retinal ganglion cells in the mouse. *Nature* **529**,  
848 345-350, doi:10.1038/nature16468 (2016).
- 849 63 Sonoda, T. *et al.* A noncanonical inhibitory circuit dampens behavioral sensitivity to light.  
850 *Science* **368**, 527-531, doi:10.1126/science.aay3152 (2020).
- 851 64 Monavarfeshani, A., Sabbagh, U. & Fox, M. A. Not a one-trick pony: Diverse connectivity  
852 and functions of the rodent lateral geniculate complex. *Vis Neurosci* **34**, E012,  
853 doi:10.1017/S0952523817000098 (2017).
- 854 65 Reese, B. E. & Keeley, P. W. Design principles and developmental mechanisms underlying  
855 retinal mosaics. *Biol Rev Camb Philos Soc* **90**, 854-876, doi:10.1111/brv.12139 (2015).
- 856 66 Wässle, H., Peichl, L. & Boycott, B. B. Dendritic territories of cat retinal ganglion cells.  
857 *Nature* **292**, 344-345, doi:10.1038/292344a0 (1981).
- 858 67 Do, M. T. *et al.* Photon capture and signalling by melanopsin retinal ganglion cells. *Nature*  
859 **457**, 281-287, doi:10.1038/nature07682 (2009).
- 860 68 Reese, B. Retinal Mosaics: Pattern Formation Driven by Local Interactions between  
861 Homotypic Neighbors. *Frontiers in Neural Circuits* **6**, doi:10.3389/fncir.2012.00024  
862 (2012).

## A subtype of melanopsin ganglion cells encodes ground luminance

- 863 69 Devries, S. H. & Baylor, D. A. Mosaic arrangement of ganglion cell receptive fields in  
864 rabbit retina. *Journal of neurophysiology* **78**, 2048-2060, doi:10.1152/jn.1997.78.4.2048  
865 (1997).
- 866 70 Fernandez, D. C., Chang, Y.-T., Hattar, S. & Chen, S.-K. Architecture of retinal projections  
867 to the central circadian pacemaker. *Proceedings of the National Academy of Sciences* **113**,  
868 6047-6052, doi:10.1073/pnas.1523629113 (2016).
- 869 71 Bleckert, A., Schwartz, G. W., Turner, M. H., Rieke, F. & Wong, R. O. Visual space is  
870 represented by nonmatching topographies of distinct mouse retinal ganglion cell types.  
871 *Curr Biol* **24**, 310-315, doi:10.1016/j.cub.2013.12.020 (2014).
- 872 72 Wolfe, J. L. & Tan Summerlin, C. The influence of lunar light on nocturnal activity of the  
873 old-field mouse. *Animal Behaviour* **37**, 410-414, doi:[https://doi.org/10.1016/0003-  
874 3472\(89\)90088-2](https://doi.org/10.1016/0003-3472(89)90088-2) (1989).
- 875 73 Upham, N. S. & Hafner, J. C. Do nocturnal rodents in the Great Basin Desert avoid  
876 moonlight? *Journal of Mammalogy* **94**, 59-72, doi:10.1644/12-mamm-a-076.1 (2013).
- 877 74 Caval-Holme, F., Zhang, Y. & Feller, M. B. Gap Junction Coupling Shapes the Encoding  
878 of Light in the Developing Retina. *Current biology : CB* **29**, 4024-4035 e4025,  
879 doi:10.1016/j.cub.2019.10.025 (2019).
- 880 75 Wilkin, L. D., Mitchell, L. D., Ganten, D. & Johnson, A. K. The supraoptic nucleus:  
881 afferents from areas involved in control of body fluid homeostasis. *Neuroscience* **28**, 573-  
882 584, doi:10.1016/0306-4522(89)90006-7 (1989).
- 883 76 Brown, C. H. Magnocellular Neurons and Posterior Pituitary Function. *Compr Physiol* **6**,  
884 1701-1741, doi:10.1002/cphy.c150053 (2016).
- 885 77 Noh, J. Y. *et al.* Circadian rhythms in urinary functions: possible roles of circadian clocks?  
886 *Int Neurourol J* **15**, 64-73, doi:10.5213/inj.2011.15.2.64 (2011).
- 887 78 Douma, L. G. & Gumz, M. L. Circadian clock-mediated regulation of blood pressure. *Free*  
888 *Radic Biol Med* **119**, 108-114, doi:10.1016/j.freeradbiomed.2017.11.024 (2018).
- 889 79 Bertram, R., Helena, C. V., Gonzalez-Iglesias, A. E., Tabak, J. & Freeman, M. E. A tale of  
890 two rhythms: the emerging roles of oxytocin in rhythmic prolactin release. *J*  
891 *Neuroendocrinol* **22**, 778-784, doi:10.1111/j.1365-2826.2010.02012.x (2010).
- 892 80 Roizen, J., Luedke, C. E., Herzog, E. D. & Muglia, L. J. Oxytocin in the circadian timing  
893 of birth. *PLoS one* **2**, e922-e922, doi:10.1371/journal.pone.0000922 (2007).
- 894 81 van den Pol, A. N. Neuropeptide transmission in brain circuits. *Neuron* **76**, 98-115,  
895 doi:10.1016/j.neuron.2012.09.014 (2012).
- 896 82 Hannibal, J. *et al.* Gene expression of pituitary adenylate cyclase activating polypeptide  
897 (PACAP) in the rat hypothalamus. *Regul Pept* **55**, 133-148, doi:10.1016/0167-  
898 0115(94)00099-j (1995).
- 899 83 Cagampang, F. R., Piggins, H. D., Sheward, W. J., Harmar, A. J. & Coen, C. W. Circadian  
900 changes in PACAP type 1 (PAC1) receptor mRNA in the rat suprachiasmatic and  
901 supraoptic nuclei. *Brain Res* **813**, 218-222, doi:10.1016/s0006-8993(98)01044-0 (1998).
- 902 84 Herzog, E. D. Neurons and networks in daily rhythms. *Nat Rev Neurosci* **8**, 790-802,  
903 doi:10.1038/nrn2215 (2007).
- 904 85 Moore, R. Y. in *Progress in Brain Research* Vol. 111 (eds R. M. Buijs *et al.*) 103-119  
905 (Elsevier, 1996).
- 906 86 Moga, M. M. & Moore, R. Y. Organization of neural inputs to the suprachiasmatic nucleus  
907 in the rat. *Journal of Comparative Neurology* **389**, 508-534 (1997).

## A subtype of melanopsin ganglion cells encodes ground luminance

- 908 87 Moldavan, M., Cravetchi, O. & Allen, C. N. Diurnal properties of tonic and synaptic  
909 GABAA receptor-mediated currents in suprachiasmatic nucleus neurons. *J Neurophysiol*  
910 **126**, 637-652, doi:10.1152/jn.00556.2020 (2021).
- 911 88 Laboulaye, M. A., Duan, X., Qiao, M., Whitney, I. E. & Sanes, J. R. Mapping Transgene  
912 Insertion Sites Reveals Complex Interactions Between Mouse Transgenes and  
913 Neighboring Endogenous Genes. *Front Mol Neurosci* **11**, 385,  
914 doi:10.3389/fnmol.2018.00385 (2018).
- 915 89 Arganda-Carreras, I. *et al.* Trainable Weka Segmentation: a machine learning tool for  
916 microscopy pixel classification. *Bioinformatics* **33**, 2424-2426,  
917 doi:10.1093/bioinformatics/btx180 (2017).
- 918 90 Sivyer, B., Tomlinson, A. & Taylor, W. R. Simulated Saccadic Stimuli Suppress ON-Type  
919 Direction-Selective Retinal Ganglion Cells via Glycinergic Inhibition. *The Journal of*  
920 *Neuroscience* **39**, 4312-4322, doi:10.1523/jneurosci.3066-18.2019 (2019).
- 921 91 Kanjhan, R. & Vaney, D. I. Semi-loose seal Neurobiotin electroporation for combined  
922 structural and functional analysis of neurons. *Pflugers Archiv : European journal of*  
923 *physiology* **457**, 561-568, doi:10.1007/s00424-008-0539-9 (2008).
- 924 92 Gobran, J. *et al.* Effects of 3D Stratification of Retinal Ganglion Cells in Sholl Analysis. *J*  
925 *Neurosci Methods* **346**, 108907, doi:10.1016/j.jneumeth.2020.108907 (2020).
- 926 93 Moldavan, M. G. & Allen, C. N. Retinohypothalamic tract synapses in the rat  
927 suprachiasmatic nucleus demonstrate short-term synaptic plasticity. *Journal of*  
928 *neurophysiology* **103**, 2390-2399, doi:10.1152/jn.00695.2009 (2010).
- 929 94 Moldavan, M. G., Sollars, P. J., Lasarev, M. R., Allen, C. N. & Pickard, G. E. Circadian  
930 Behavioral Responses to Light and Optic Chiasm-Evoked Glutamatergic EPSCs in the  
931 Suprachiasmatic Nucleus of ipRGC Conditional vGlut2 Knock-Out Mice. *eNeuro* **5**,  
932 ENEURO.0411-0417.2018, doi:10.1523/ENEURO.0411-17.2018 (2018).
- 933

## A subtype of melanopsin ganglion cells encodes ground luminance

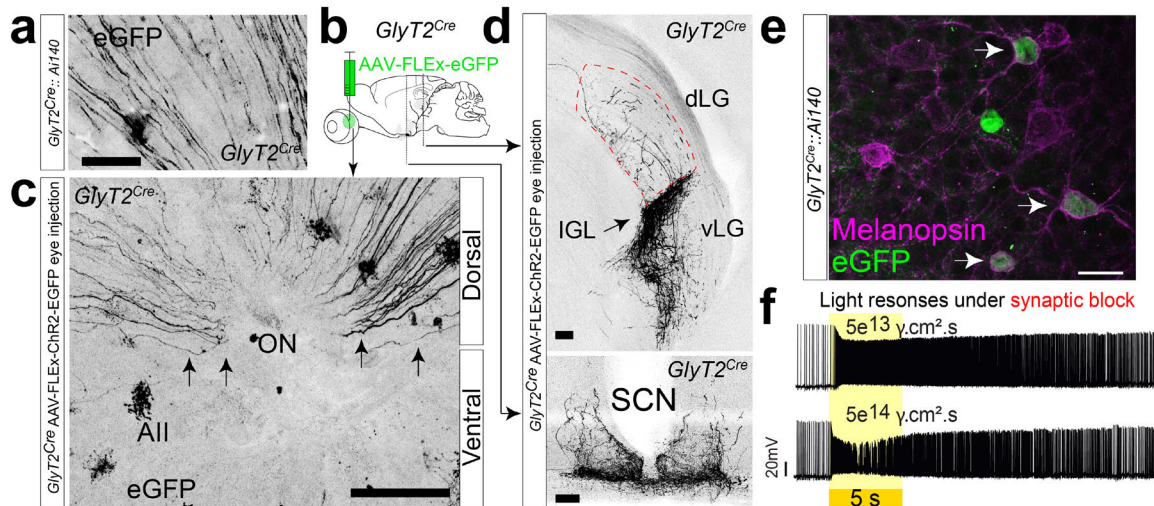

**Figure 1: A subpopulation of ipRGCs in dorsal retina**

**(a)** RGC axons identified in the dorsal portion of *GlyT2<sup>Cre</sup>;Ai140* whole mount retina. **(b-d)** Cre-dependent virus injection into the eyes of *GlyT2<sup>Cre</sup>* mice label RGC axons that project from the dorsal retina via the optic nerve (ON) **(c)** to non-image forming central areas **(d)**: Intergeniculate leaflet (IGL; top) and suprachiasmatic nucleus (SCN; bottom; dLG & vLG = dorsal & ventral lateral geniculate nucleus). **(e)** Confocal micrographs of melanopsin antibody staining (magenta) in *GlyT2<sup>Cre</sup>;Ai140* mice labelling cells with eGFP (green). **(f)** Current clamp recordings of light responses to 5 sec visual stimuli under synaptic block (20  $\mu$ M L-AP4, 25  $\mu$ M DAP5, 20  $\mu$ M CNQX) illustrate *GlyT2<sup>Cre</sup>*-positive RGCs are intrinsically photosensitive (ipRGCs). Scale bar in a = 20  $\mu$ m, c = 100  $\mu$ m, d = 100  $\mu$ m, e = 20  $\mu$ m.

## A subtype of melanopsin ganglion cells encodes ground luminance

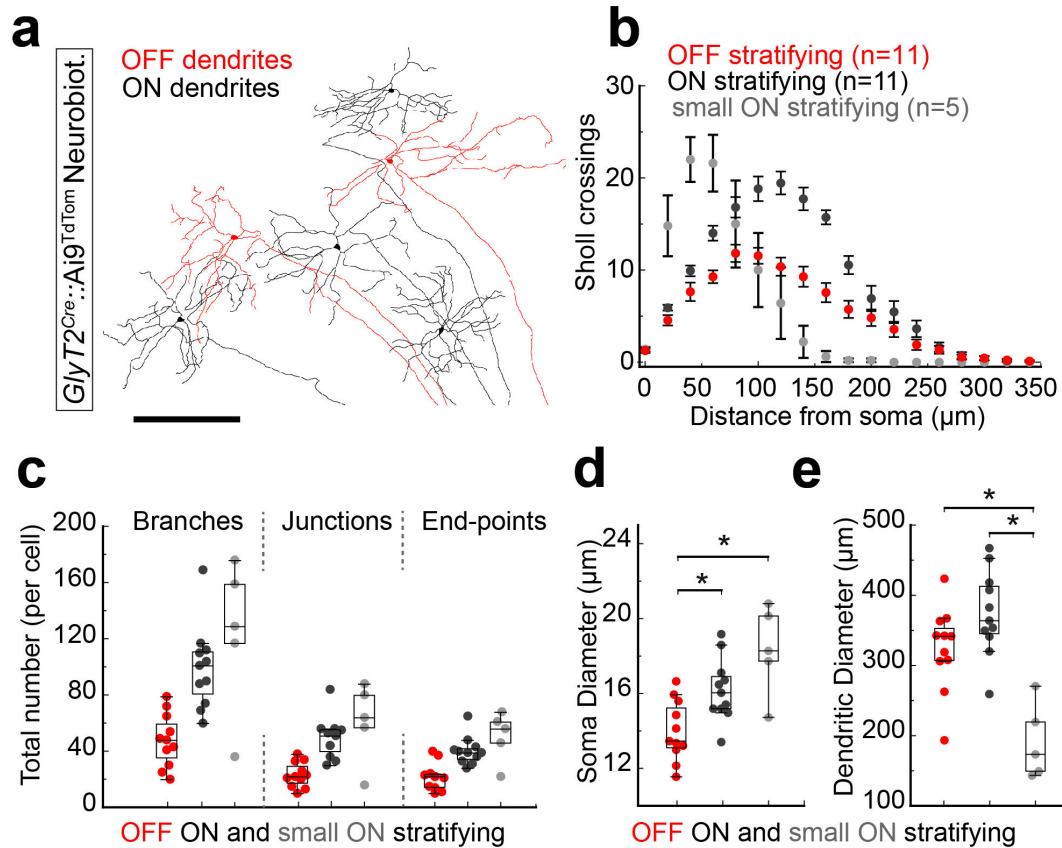

**Figure 2: Dendritic morphology of *GlyT2<sup>Cre</sup>* ipRGCs**

(a) Tracings of Neurobiotin electroporated *GlyT2<sup>Cre</sup>* ipRGCs illustrate multiple morphological subtypes with dendritic stratification in the OFF (red) or ON (black) layers of the inner plexiform layer (IPL). (b) Dendritic crossings at radial distances from each soma (Sholl analysis) (c), number of branches, junctions and end-points, as well as total soma (d) and dendritic diameter (e) quantified per morphologically distinct subpopulation. n = 11 OFF stratifying ipRGCs (M1), 11 ON or partially bi-stratified, and 5 small ON stratifying cells (mixed ON stratifying/non-M1 ipRGCs). Values are mean $\pm$ SEM. Statistical significance assessed using one-way Anova with Bonferroni correction for comparisons between multiple groups (\* $p \leq 0.05$ ). Scale bar = (a);300  $\mu\text{m}$

## A subtype of melanopsin ganglion cells encodes ground luminance

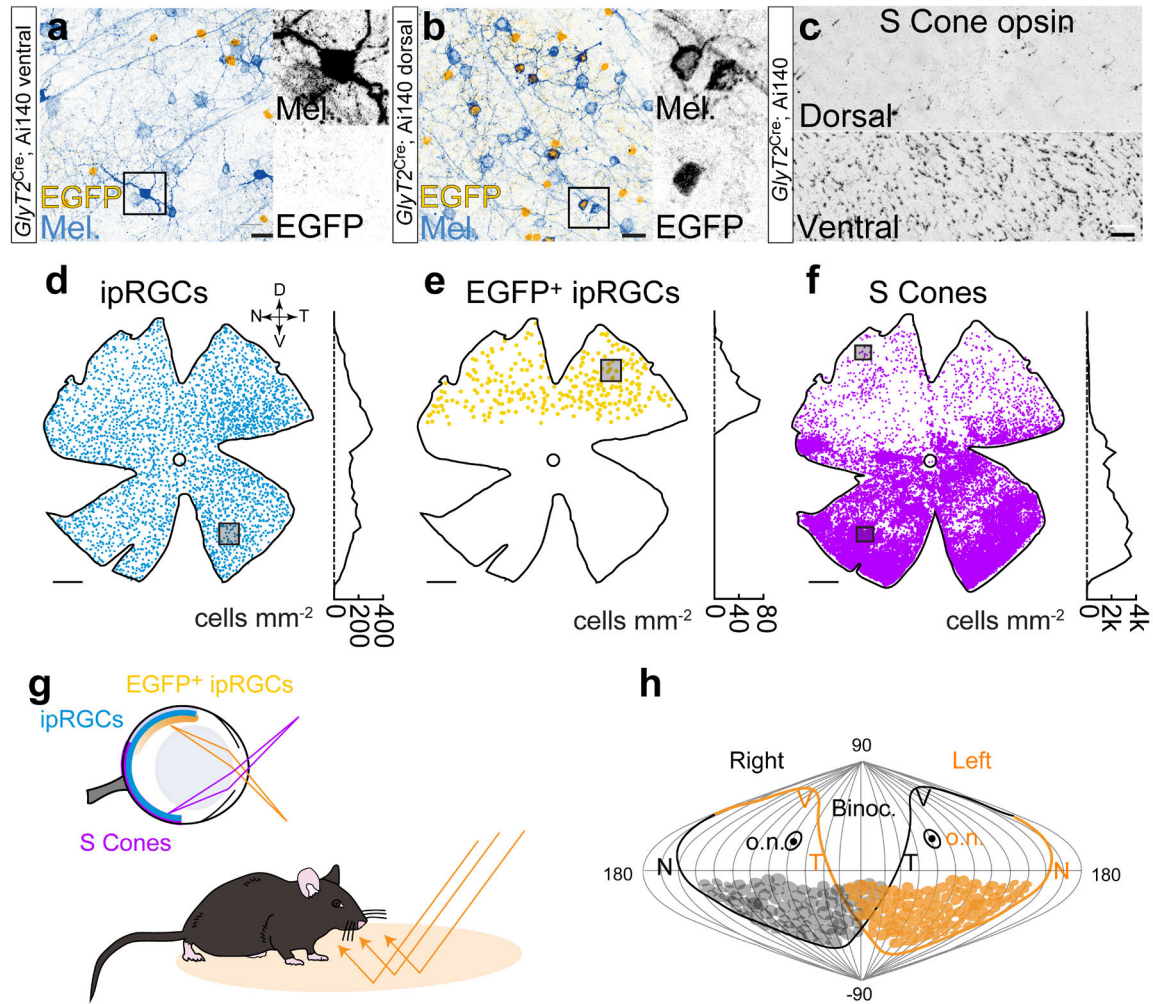

**Figure 3: Localized distribution of *GlyT2<sup>Cre</sup>* positive ipRGCs capture reflected light**  
 Confocal micrographs and density maps of neurons labeled in *GlyT2<sup>Cre</sup>* mice. **(a)** Melanopsin positive ipRGCs in the ventral retina are negative for EGFP. **(b)** In the dorsal retina many ipRGCs are EGFP positive and overlap with EGFP-negative ipRGCs. **(c)** Antibody staining for mouse S-cone opsin illustrates sparse labelling in the dorsal retina and dense staining in the ventral retina. **(d)** Location map of  $n = 3314$  melanopsin immunopositive ipRGCs throughout the retina. Density at each retinal location along the dorso-ventral axis is plotted on the right (100  $\mu\text{m}$  bins across the Y axis) illustrating the higher density of ipRGCs in the dorsal retina. Square = region in a. **(e)** 293 ipRGCs were EGFP-positive and restricted to a region of retina that is low in **(f)** S cone opsin density. Squares = regions in b, and c above, respectively. **(g)** Illustration of the *GlyT2<sup>Cre</sup>* ipRGCs in the dorsal retina of the mouse encoding light in the ventral visual field (reflected off the ground), High density of S cones aligned with the dorsal visual field (purple). Purple = density of S cones, blue = all ipRGCs, orange = *GlyT2<sup>Cre</sup>* ipRGCs. **(h)** Distribution of *GlyT2<sup>Cre</sup>* ipRGCs in both eyes plotted in a sinusoidal projection adapted from Bleckert et al. 2014<sup>1</sup>. Orange outline = edge of left retina; black outline = edge of right retina. on = optic nerve. D = dorsal, V = ventral, N = nasal, T = temporal. Scale bars in (a,b,c) 25  $\mu\text{m}$ , (d,e,f); 0.5 mm.

## A subtype of melanopsin ganglion cells encodes ground luminance

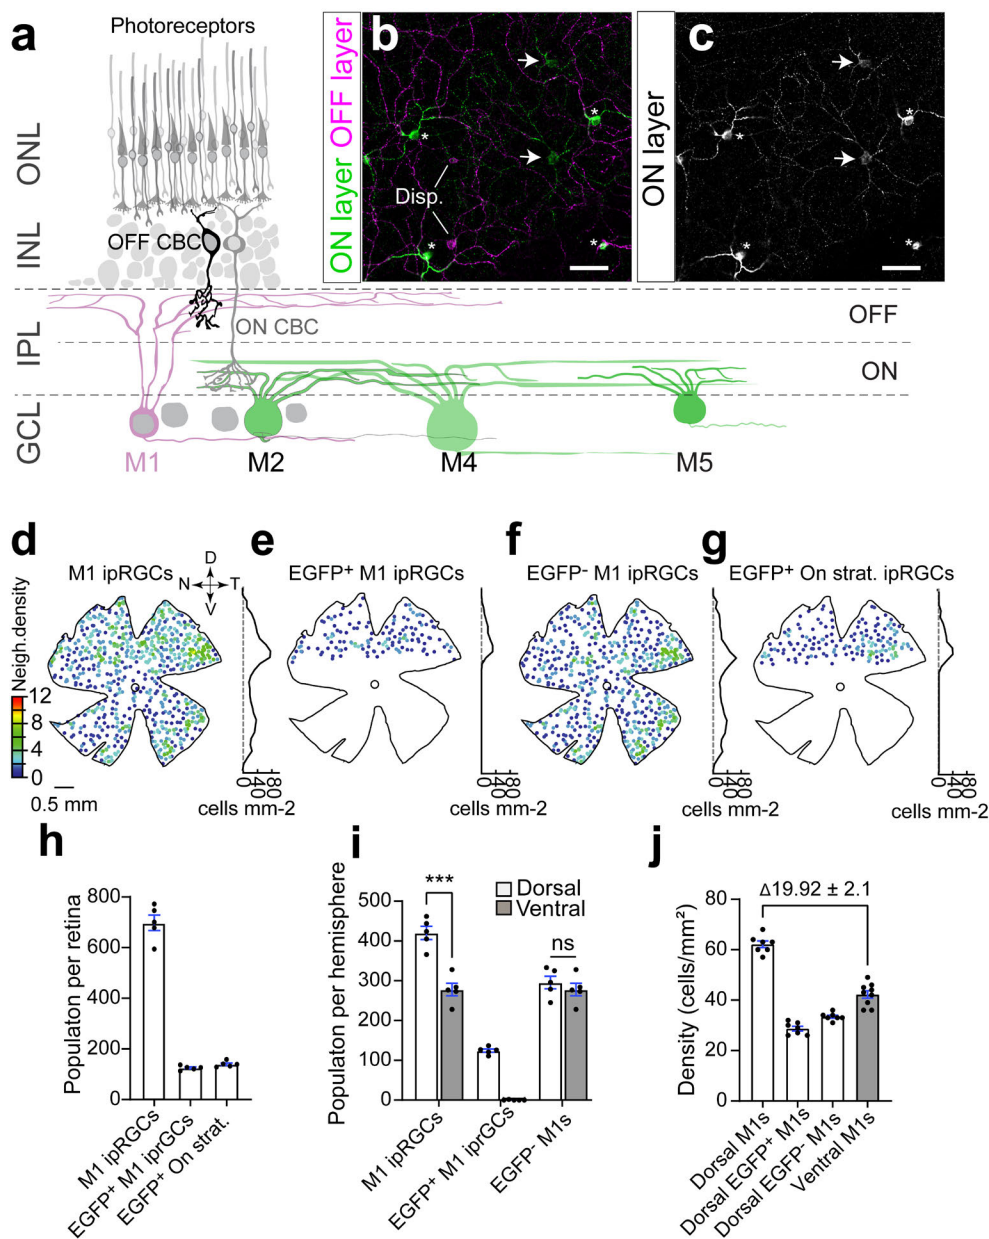

### Figure 4: An additional M1 ipRGC visual channel dedicated to the dorsal retina

(a) Schematic of the retinal circuit with rod and cone photoreceptors located in the outer nuclear layer (ONL) and photosensitive ipRGCs in the ganglion cell layer (GCL). Some of the 6 ipRGC types (bistratified ipRGCs excluded) differ in their dendritic size and stratification in the ON (green) and OFF (magenta) inner plexiform layer (IPL). (b-c) confocal micrographs of ipRGCs stain with melanopsin antibody illustrating M1 ipRGCs (asterisks) identified as their dendrites clearly transition to from the ON layer (b; green; c) to the OFF layer (b; magenta). ON ipRGCs can be identified by their primary dendrites branching in the ON layer (arrows in b,c) (d) Neighbor density maps of morphologically identified M1 ipRGCs (melanopsin+), (e) EGFP+ M1 ipRGCs, (f) EGFP- M1 ipRGCs, and (g) EGFP+ On stratifying ipRGCs. Each cell is color coded according to the number of neighboring cells within a diameter of 220  $\mu$ m. Hotter colored cells lie within regions of higher density such as the dorsal retina for all M1 ipRGCs and the temporal retina for



## A subtype of melanopsin ganglion cells encodes ground luminance

EGFP- M1 ipRGCs **(h)** Bar graph of quantified M1 ipRGCs, EGFP<sup>+</sup> M1 ipRGCs, and ON stratifying EGFP<sup>+</sup> ipRGCs in retina whole mount. **(i)** Population per hemisphere and **(j)** density (dorsal; white vs. ventral; gray) for morphologically identified M1 ipRGCs per 1 mm<sup>2</sup>. EGFP<sup>+</sup>M1s = (All) M1 ipRGCs - EGFP<sup>+</sup>M1 ipRGCs. Values are mean ± SEM. Statistical significance assessed using one-way Anova. \*\*\* = p <0.001, n = 4 retina. Scale bar in (b) and (c) = 50 μm.

## A subtype of melanopsin ganglion cells encodes ground luminance

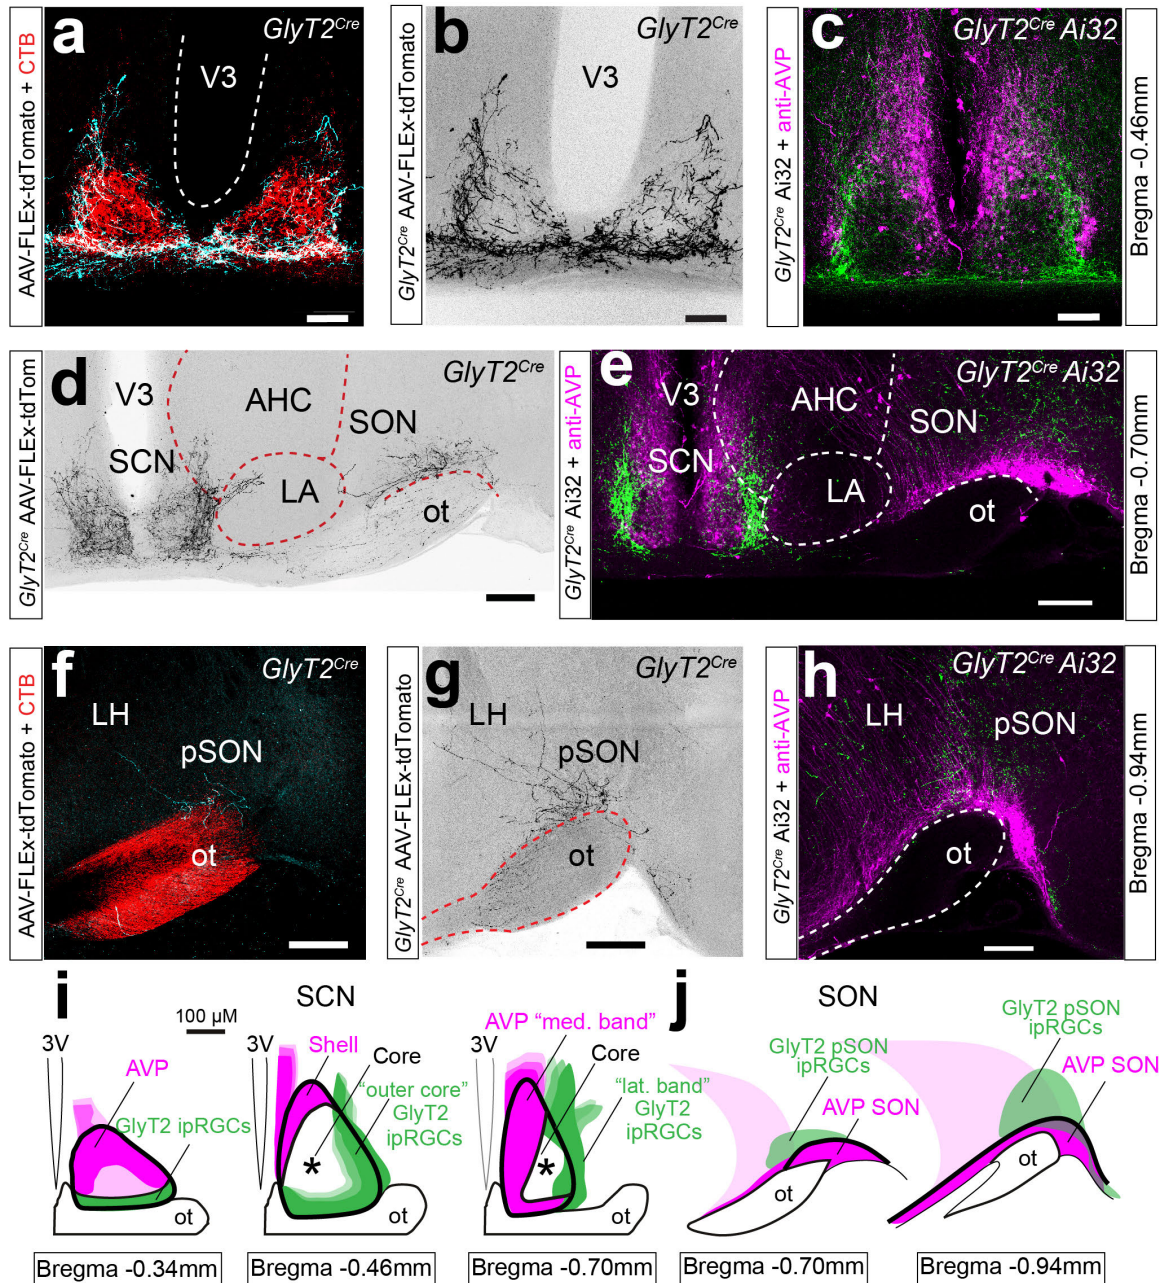

**Figure 5: *GlyT2<sup>Cre</sup>* ipRGCs project to the SON and a SCN sub-region**

(a-n) Intravitreal eye injections of Cre-dependent AAV (AAV-FLEX-tdTomato) in the *GlyT2<sup>Cre</sup>* mouse allowed anterograde tracing of central projections in confocal images of coronal 200 μm brain sections. Cholera toxin subunit B (CTB), was co-injected to label all RGC axons. (a-b) The SCN receives dense ipRGC input at its central core (a – red) *GlyT2<sup>Cre</sup>* ipRGCs (blue) largely avoid the central core and instead innervate the outer core in the rostral SCN and form a lateral band in the caudal SCN. (c) Outer core and lateral band localized in the *GlyT2<sup>Cre</sup>;Ai32* (green = YFP of *GlyT2<sup>Cre</sup>* ipRGC terminals) is distinct from the anatomical shell of the SCN localized by arginine vasopressin neurons (AVP – magenta). (d,e) In the caudal SCN the lateral band extends into lateral hypothalamic (LA)

## A subtype of melanopsin ganglion cells encodes ground luminance

and anterior hypothalamic (AHC) areas in eye injected *GlyT2<sup>Cre</sup>* (d) and *GlyT2<sup>Cre</sup>.Ai32* mice (e). **(d-h)** *GlyT2<sup>Cre</sup>* ipRGCs innervate the supraoptic nucleus (SON) observed in eye injected *GlyT2<sup>Cre</sup>* (d,f,g) and *GlyT2<sup>Cre</sup>.Ai32* mice (e,h) superior to the dense AVP-positive cell bodies of the SON (magenta). **(i,j)** Summary illustrations of *GlyT2<sup>Cre</sup>* ipRGC projections (green) to the (i) SCN outer core and SCN lateral band as well as projections to the (j) SON, superior to the dense AVP+ cell bodies (magenta). Anatomical distances from bregma determined from the Franklin & Paxinos Mouse Brain Coordinate Atlas. Scale bar = (a-c,i);100  $\mu$ m, (d-h); 200  $\mu$ m.

## A subtype of melanopsin ganglion cells encodes ground luminance

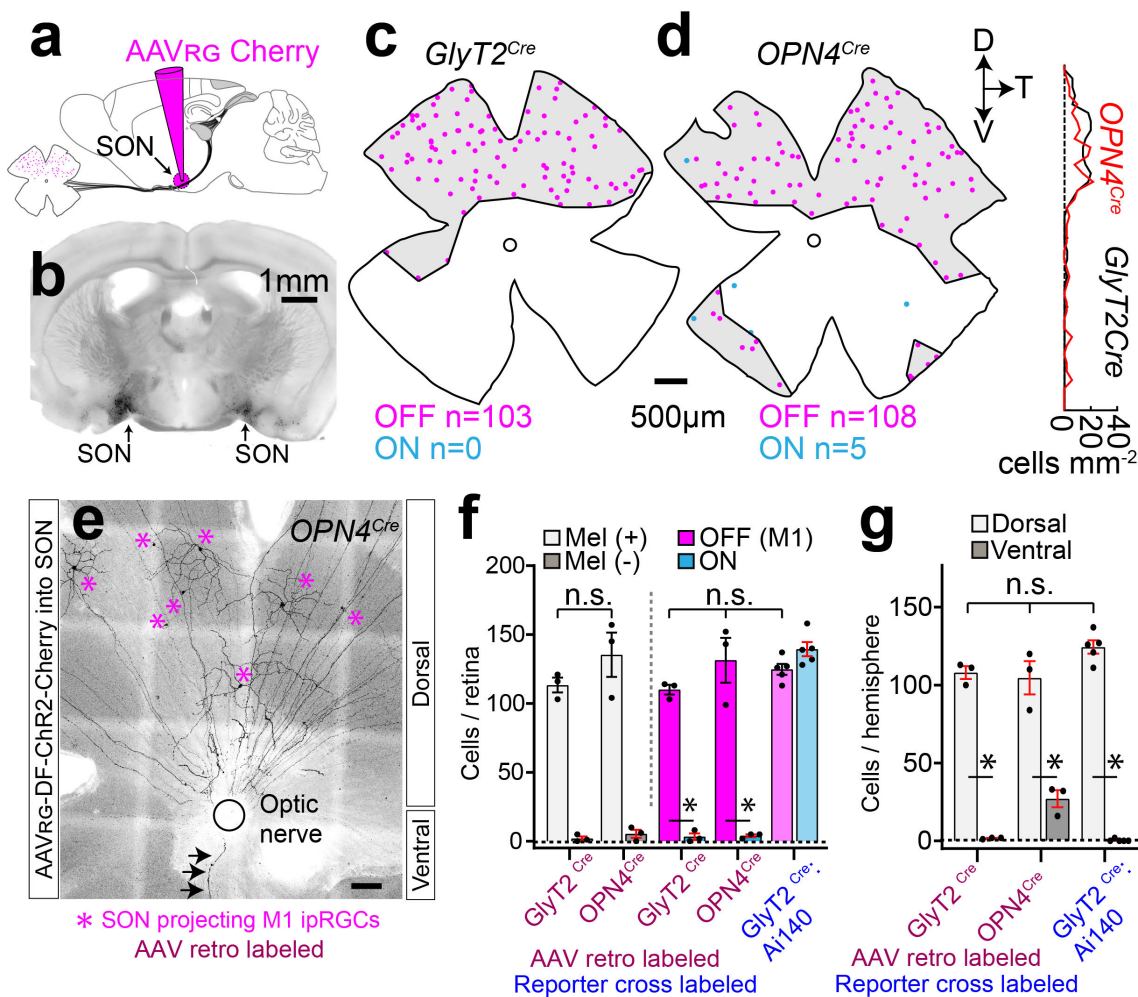

### Figure 6: *GlyT2<sup>Cre</sup>* ipRGCs form the principle projection to the SON

**(a,b)** Stereotactic injections of Cre-dependent retroAAV (magenta) into the SON (**b**) labels **(c,d)** a population of M1 ipRGCs (OFF stratifying; magenta) in the *GlyT2<sup>Cre</sup>* **(c)** and *OPN4<sup>Cre</sup>* **(d)** mouse lines. Density at each retinal location along the dorso-ventral axis is plotted on the right. **(e)** Confocal image of the flat mount retina illustrates that retro-labeled M1 ipRGCs in the *OPN4<sup>Cre</sup>* localize to the dorsal retina, black arrows indicate a rare ventral axon. **(f)** Bar graphs of ipRGCs per retina that are melanopsin positive (white) or negative (gray) (left) and either OFF (M1, magenta) or ON (turquoise) stratifying ipRGCs (right) in SON injected *GlyT2<sup>Cre</sup>* and *OPN4<sup>Cre</sup>* mice retinas (AAV retro labeled; maroon). *GlyT2<sup>Cre</sup>;Ai140* retinas quantified for comparison (I - far right, Reporter cross labeled; blue). **(g)** Bar graphs of population of cells per hemisphere in the SON injected *GlyT2<sup>Cre</sup>* and *OPN4<sup>Cre</sup>* mouse retinas. *GlyT2<sup>Cre</sup>;Ai140* retinas quantified for comparison (g - far right). Values are mean±SEM. Statistical significance assessed using one-way Anova with Bonferroni correction for comparisons between multiple groups (\* $p \leq 0.01$ ) Scale bar = (a); 1mm, (c,d); 500  $\mu\text{m}$ ,(e);100  $\mu\text{m}$ .

## A subtype of melanopsin ganglion cells encodes ground luminance

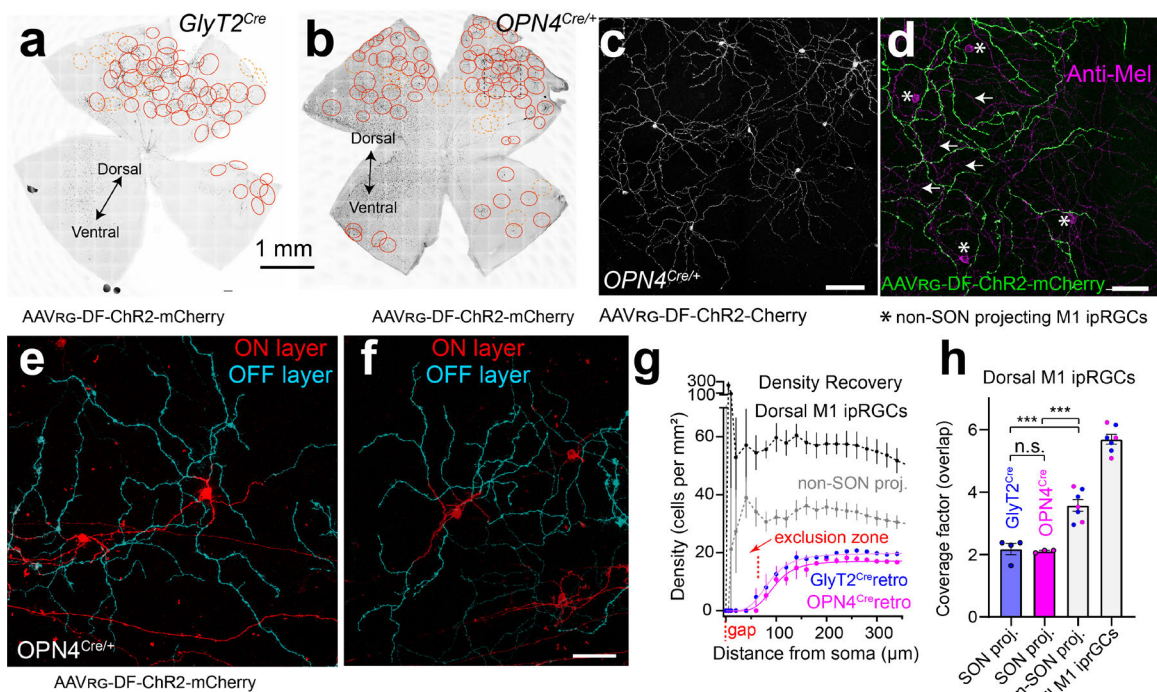

### Figure 7: SON ipRGCs form a tiling mosaic that minimizes dendritic overlap.

Whole retina images of tiling SON M1 ipRGCs retro-labeled in the *GlyT2<sup>Cre</sup>* (a) and *OPN4<sup>Cre</sup>* (b) with dendritic arbor circled in red. (c) Confocal images of mosaic spacing in SON M1 ipRGCs labeled in the *OPN4<sup>Cre</sup>*. (d) Higher magnification confocal image of OFF stratifying dendrites (green) which overlap with surrounding M1 ipRGCs dendrites stained with anti-melanopsin (magenta; arrows). Some displaced M1 ipRGC cell bodies (asterisk) are not labeled in the SON injection. (e,f) Dendritic morphology of SON M1 ipRGCs illustrate they have 3-4 short dendritic segments in the ON layer (red) that dive into their terminal dendrites in the OFF layer (cyan). (g) Density recovery profile displaying density of cell bodies at distances (μm) from each soma. Gap (red) indicates minimal overlap of SON ipRGCs in the SON-injected *GlyT2<sup>Cre</sup>* and *OPN4<sup>Cre</sup>* retina. (h) Coverage factor or the proportion of dendritic overlap calculated from the average diameter of M1 ipRGCs, measured from Neurobiotin fills. Non-SON proj. M1s (grey) = M1 ipRGCs not labeled in the central injection. Dorsal M1s = Non-SON projecting M1s + retro labeled (SON projecting) M1s. Statistical significance assessed using one-way Anova with Bonferroni correction for comparisons between multiple groups (\*\*\*)  $p \leq 0.001$  Scale bar = (a,b); 1 mm, (c); 100 μm, (d-f); 50 μm.

## A subtype of melanopsin ganglion cells encodes ground luminance

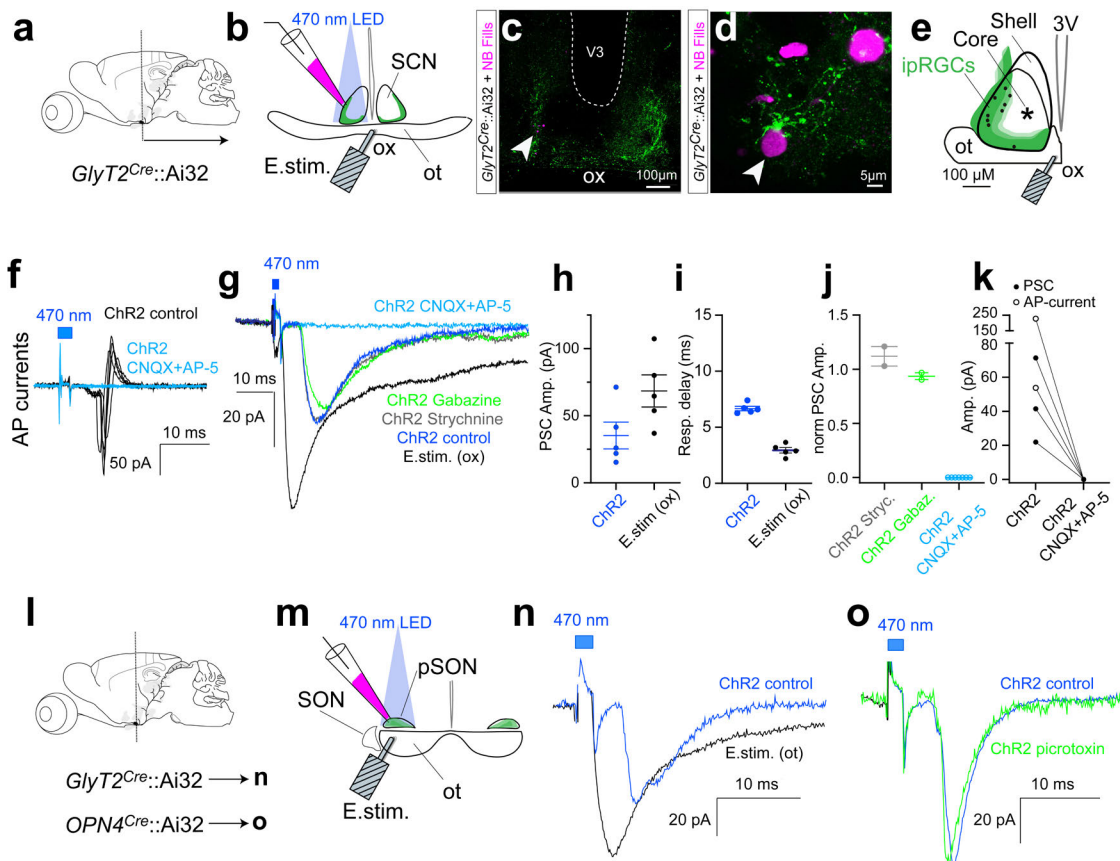

**Figure 8: SON-ipRGCs release glutamate in the 'outer core' of the SCN**

**(a,b)** Brain slice recordings in the SCN were performed in coronal sections of *GlyT2<sup>Cre</sup>::Ai32* mice. Patch electrode prefilled with Neurobiotin (magenta) and electrical stimulating electrode placed in the optic chiasm (ox; E.stim) in order to stimulate retinal axons. **(c)** Confocal images of SCN slice, immunostained following recordings. **(d)** Recorded cells localized with Neurobiotin in close proximity to SON-ipRGC terminals. **(e)** Location of the photo-responsive cells (black dots) relative to SON-ipRGC central innervation of the SCN outer core (green). **(f)** Photo-stimulation evoked action potential currents (black) are abolished following bath application of CNQX + AP-5 (light blue). **(g)** Whole cell voltage clamp recording traces of electrical (black) and channelrhodopsin-evoked (ChR2) inward post-synaptic currents (PSCs) in control (dark blue), 1  $\mu$ M strychnine (grey), 10  $\mu$ M SR-95531 (green). ChR2-evoked currents were abolished with CNQX (20  $\mu$ M) and AP-5 (50  $\mu$ M; light blue). **(h)** Response amplitude and **(i)** delay of ChR2- evoked (right) and electrical stimulation evoked (E.Stim) PSCs in the same SCN neurons. **(j)** ChR2-evoked response amplitude in strychnine (grey), SR-95531 (green), or CNQX + AP-5 (light blue) normalized to the control response amplitude. Values are mean  $\pm$  SEM. **(k)** PSC amplitude before and after CNQX + AP-5. **(l, m)** Coronal brain slices were used for recordings in the SON of the *GlyT2<sup>Cre</sup>::Ai32* mouse and *OPN4<sup>Cre</sup>::Ai32* mouse. **(n)** Whole cell voltage clamp recording traces of electrical (black) and ChR2-evoked inward post-synaptic currents (PSCs) (blue) in the SON. **(o)** Voltage clamp recording traces of ChR2-evoked inward post-synaptic currents (PSCs) in the SON before (blue) and after (green) 50  $\mu$ M picrotoxin. Statistical significance assessed using one-way Anova with Sidak correction for comparisons between multiple groups (\* $p \leq 0.01$ ). Scale bar = (c); 100  $\mu$ m, (d); 5  $\mu$ m.

## A subtype of melanopsin ganglion cells encodes ground luminance

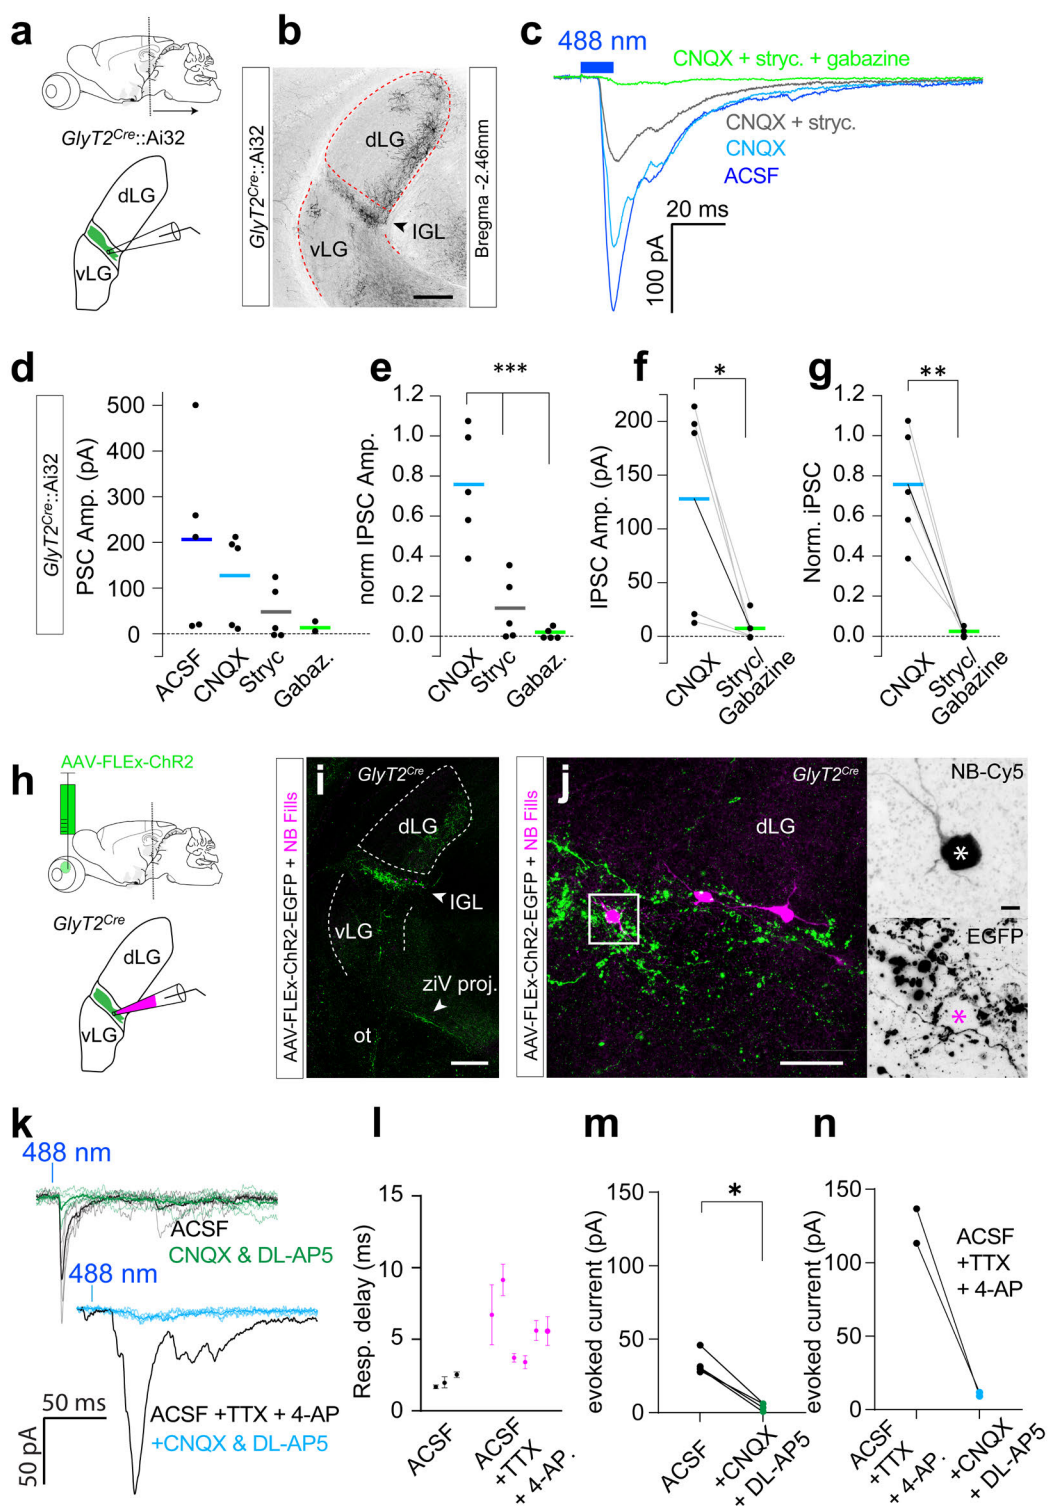

**Figure 9: SON-ipRGCs release glutamate at the IGL**

(a) Coronal sections were used for brain slice recordings in the IGL of the *GlyT2<sup>Cre</sup>;Ai32* mouse. (b) Confocal image of the ventral lateral geniculate nucleus (vLG), intergeniculate

## A subtype of melanopsin ganglion cells encodes ground luminance

leaflet (IGL), and the dorsal lateral geniculate nucleus (dLG) illustrating EYFP expression in *GlyT2<sup>Cre</sup>;Ai32* brain. **(c)** Whole cell voltage clamp recording traces of photo-stimulation under Control (blue), 20  $\mu$ M CNQX (light blue), 0.5  $\mu$ M strychnine + CNQX (gray), and 3  $\mu$ M gabazine + strychnine + CNQX (green). **(d,e)** Photo-response amplitude (d) and normalized photo-response amplitude (e) of PSC under blocker conditions. **(f,g)** Photo-response amplitude (f) and normalized photo-response amplitude (g) in CNQX before and after the addition of gabazine + strychnine. **(h)** Illustration of brain slice recordings in the IGL of the *GlyT2<sup>Cre</sup>* mouse 3wks following Cre-dependent ChR2 expression in the eye. **(i-j)** Confocal images of EGFP expression in the IGL brain slice, fixed after recording. Biocytin filled IGL neuron (magenta) surrounded by SON-ipRGC terminals (green). **(k)** (k-top) Photo-stimulation evoked inward PSCs (black) that were blocked by excitatory neurotransmitters CNQX and DL-AP5 (green). (k-bottom) Photo-stimulation evoked inward PSCs (black) in tetrodotoxin and 4-aminopyridine were blocked with co-application of CNQX and DL-AP5 (blue). **(l)** Response delay indicating the time to peak following a 1 ms ChR2 stimulation in ACSF (black; n = 3 cells mean  $\pm$  SEM between trials), and following the application of TTX and 4-AP (magenta, n = 5, mean  $\pm$  SEM between trials) **(m)** Amplitude of photo-induced PSC in ACSF before and after CNQX and DL-AP5. b Amplitude of photo-induced PSC in ACSF with TTX and 4-AP before and after CNQX and DL-AP5. Statistical significance assessed using one-way Anova with Holm-Sidak's correction for multiple comparisons (\*\*\*)  $p \leq 0.001$ . Scale bar = (a,i); 250  $\mu$ m, (j); 50  $\mu$ m.



A subtype of melanopsin ganglion cells encodes ground luminance

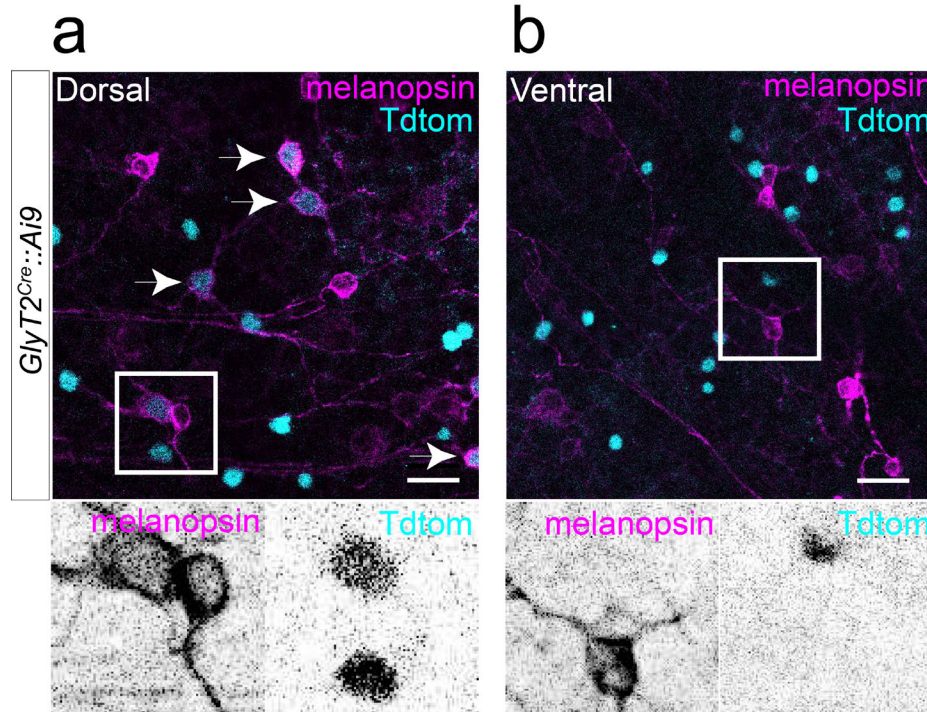

**Supplementary Figure 1: Fluorescent ipRGCs in the dorsal retina of the *GlyT2<sup>Cre</sup>;Ai9* mice.**

Confocal images of melanopsin expressing (magenta) Tdtomato+ (cyan) ipRGCs in the dorsal (a) but not the ventral (b) hemisphere of the wholemount retina of the *GlyT2<sup>Cre</sup>;Ai9* mouse. Scale bar = (a,b); 25  $\mu$ m.

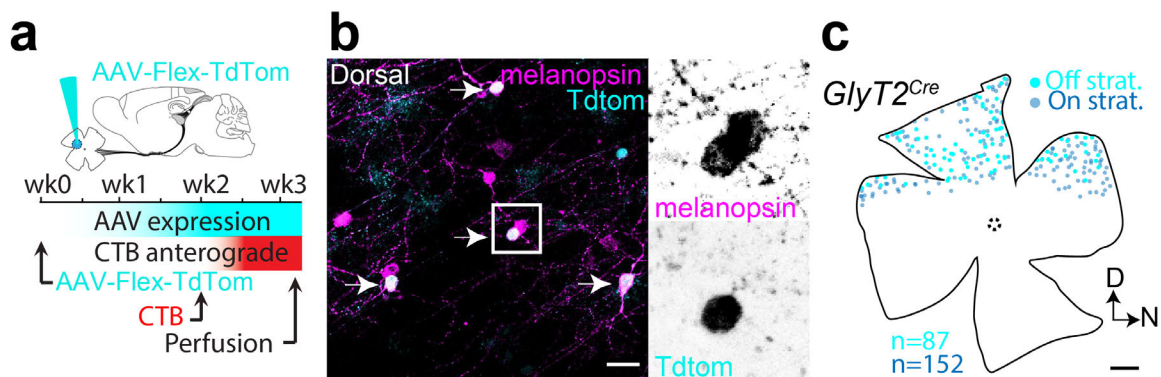

**Supplementary Figure 2: Cre-dependent anterograde AAV labeling strategy**

(a) Anterograde eye injection protocol used for identifying the central projections of *GlyT2<sup>Cre</sup>* ipRGCs (Cre-dependent AAV – TdTomato; cyan) among RGC recipient areas (CTB labeling of all RGC axons, red). (b) A Cre-dependent AAV was used to drive fluorescent TdTomato expression (cyan) in the *Cre+* retinal neurons. Melanopsin (magenta) staining confirmed that all virally labeled RGCs are ipRGCs (white). (c) Retina map and subtype distribution of AAV labeled *GlyT2<sup>Cre</sup>* ipRGCs in the retina. OFF stratified (cyan) and ON stratified (blue) refers to the layer of the inner plexiform layer (INL) in which the dendrites terminate. Scale bars: (b); 25  $\mu$ m. (c); 500  $\mu$ m.

## A subtype of melanopsin ganglion cells encodes ground luminance

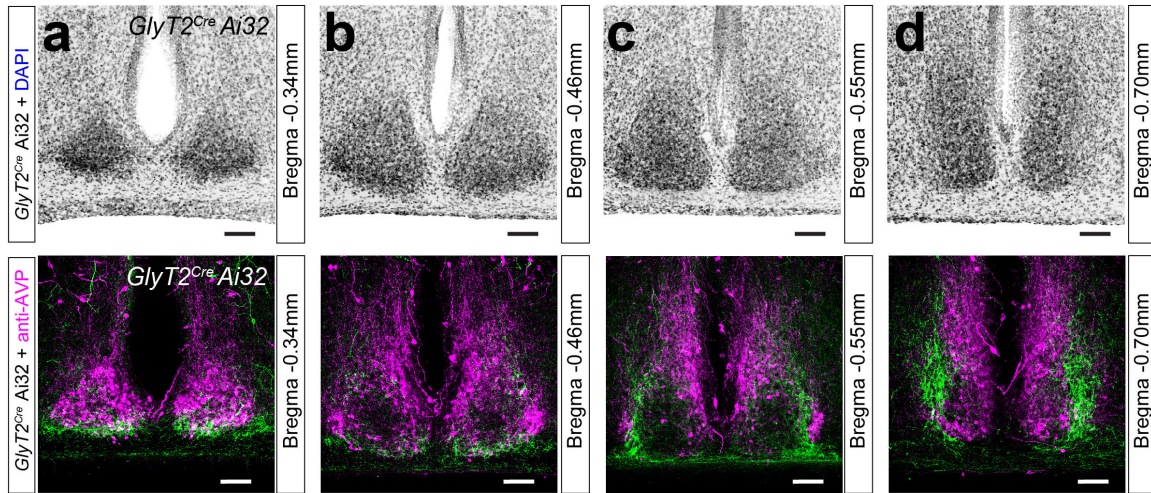

### Supplementary Figure 3: Distinct anatomical areas of the SCN innervated by axons from *GlyT2<sup>Cre</sup>* ipRGCs

Coronal sections of the SCN of a *GlyT2<sup>Cre</sup>;Ai32* mouse, presented anterior to posterior. EYFP-expressing *GlyT2<sup>Cre</sup>* ipRGCs (bottom - green) innervate previously undescribed locations of the SCN we call the outer core and lateral band, avoiding the SCN shell defined by AVP staining (bottom - magenta). DAPI (top) provides an anatomical reference. Scale bars: (a-d); 100  $\mu$ m.

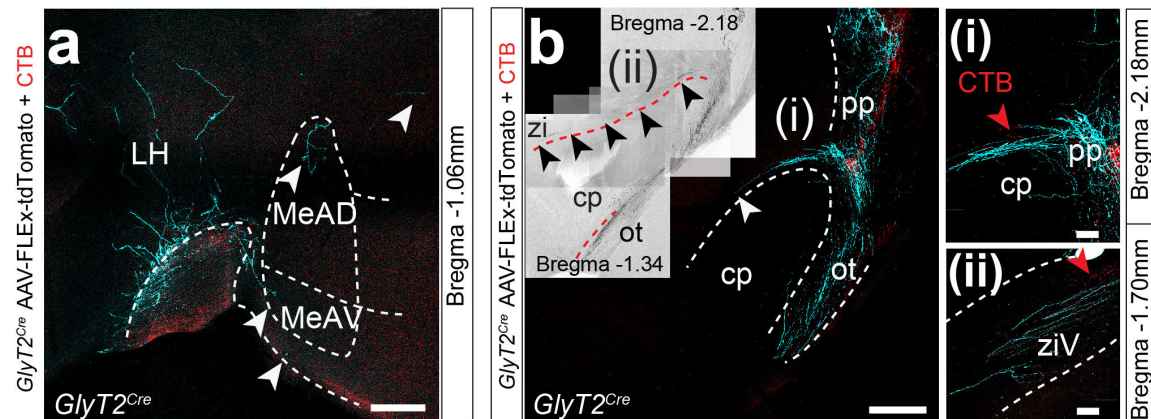

### Supplementary Figure 4: Other sites of hypothalamic projection

(a) Cre-dependent AAV (AAV-FLEX-tdTomato) eye injection in the *GlyT2<sup>Cre</sup>* mouse also labeled sparse projections in the lateral hypothalamus and in the anteroventral and anterodorsal edges of the medial amygdalar nucleus (MeAD & MeAV). (b) At the level the rostral ventral lateral geniculate nucleus (vLGN), before entering the geniculate complex, *GlyT2<sup>Cre</sup>* ipRGCs emerge from the optic tract and split at the peripeduncular nucleus (pp) (n(i)). A moderate number of ventromedial axons wrap around the cerebral peduncle (cp) and project nearly 1mm caudally along the ventral length of the zona incerta (ziV) (i,ii = inlay from n) (red arrow denotes presence of CTB). The function of the zona incerta is unknown. Scale bars: (a,b); 200  $\mu$ m, (i,ii); 50  $\mu$ m.

## A subtype of melanopsin ganglion cells encodes ground luminance

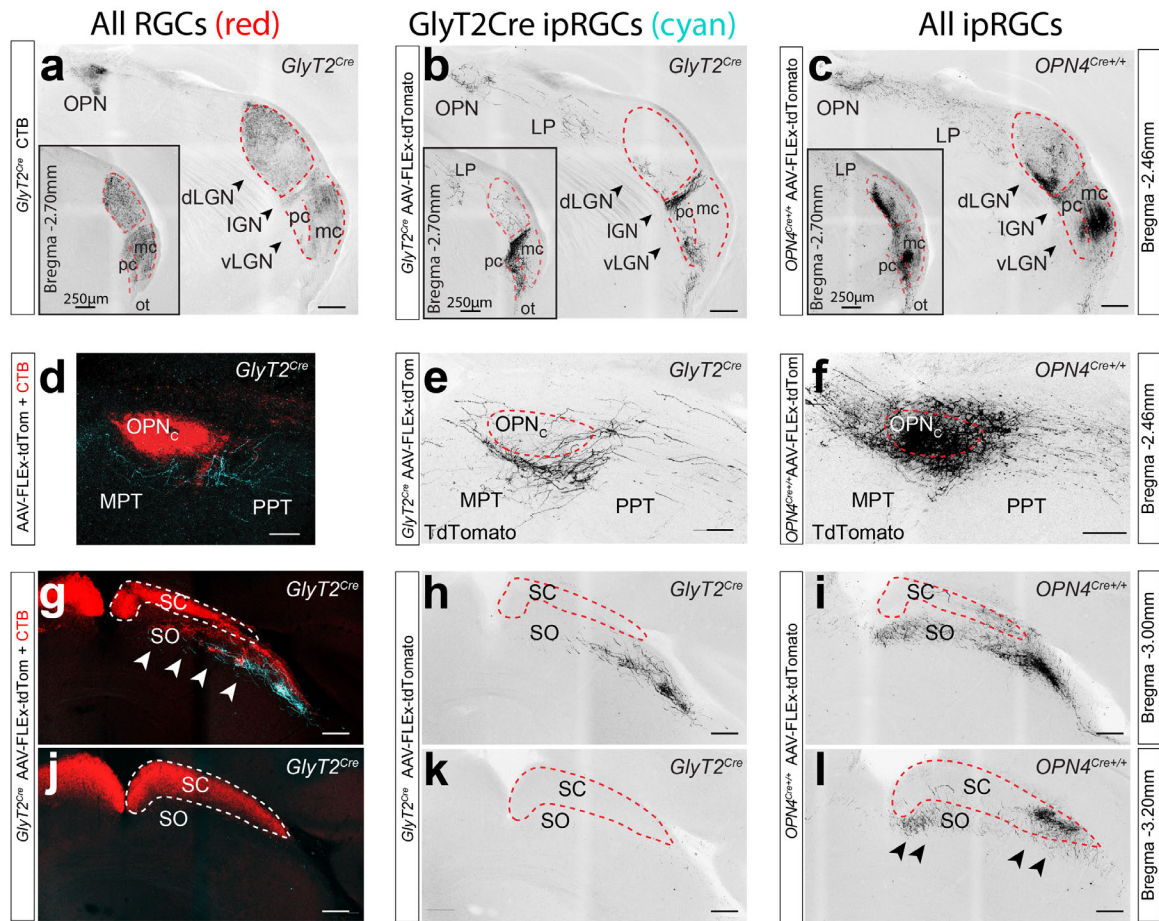

### Supplementary Figure 5: Thalamic, pretectal, and collicular ipRGC projections

Antegrade tracing of central projections in *GlyT2<sup>Cre</sup>* and *OPN4<sup>Cre</sup>* mouse lines following intravitreal eye injections with Cre-dependent AAV (AAV-FLEX-tdTomato). Cholera toxin subunit B (CTB), which labels all RGC axons, was used for anatomical assistance (a,d,j – red). **(a-c)** Confocal images of coronal brain slice reveal that ipRGCs labeled in the *GlyT2<sup>Cre</sup>* innervate the parvocellular (pc) division of the ventrolateral geniculate complex (vLGN) and the intergeniculate leaflet (IGL) **(b)** IpRGCs labeled in the *OPN4<sup>Cre</sup>* more broadly innervate the parvocellular (pc) and magnocellular (mc) divisions of the vLGN, IGL, and focal portions of the dorsolateral geniculate complex (dLGN) **(c)** *GlyT2<sup>Cre</sup>* ipRGCs also form a plexus of terminals in the lateral posterior nucleus (LP). **(d-f)** Confocal images of the olivary pretectal nucleus (OPN) identify that *GlyT2<sup>Cre</sup>* ipRGCs innervate the ventral cup of the OPN shell, where ipRGCs labeled in the *OPN4<sup>Cre</sup>* project to both core and shell regions, similar to that observed by CTB labeling (d – red). Sparse innervation to neighboring pretectal structures such as medial pretectal (MPT) and posterior pretectal (PPT) areas are also observed. **(g-i)** Confocal images of the superior colliculus (SC), reveal that *GlyT2<sup>Cre</sup>* ipRGCs have some innervation to the superior colliculus (SC) **(h)**, like many ipRGCs and RGCs (g,i,j,l). These projections are sparse and localized to the superficial layer of the stratum opticum (SO) (h), with very few projections to the central SC, unlike those in the *OPN4<sup>Cre</sup>* or the CTB labeling (d – red). Scale bars: (a-c,g-l); 250  $\mu$ m, (d-f); 100  $\mu$ m.

## A subtype of melanopsin ganglion cells encodes ground luminance

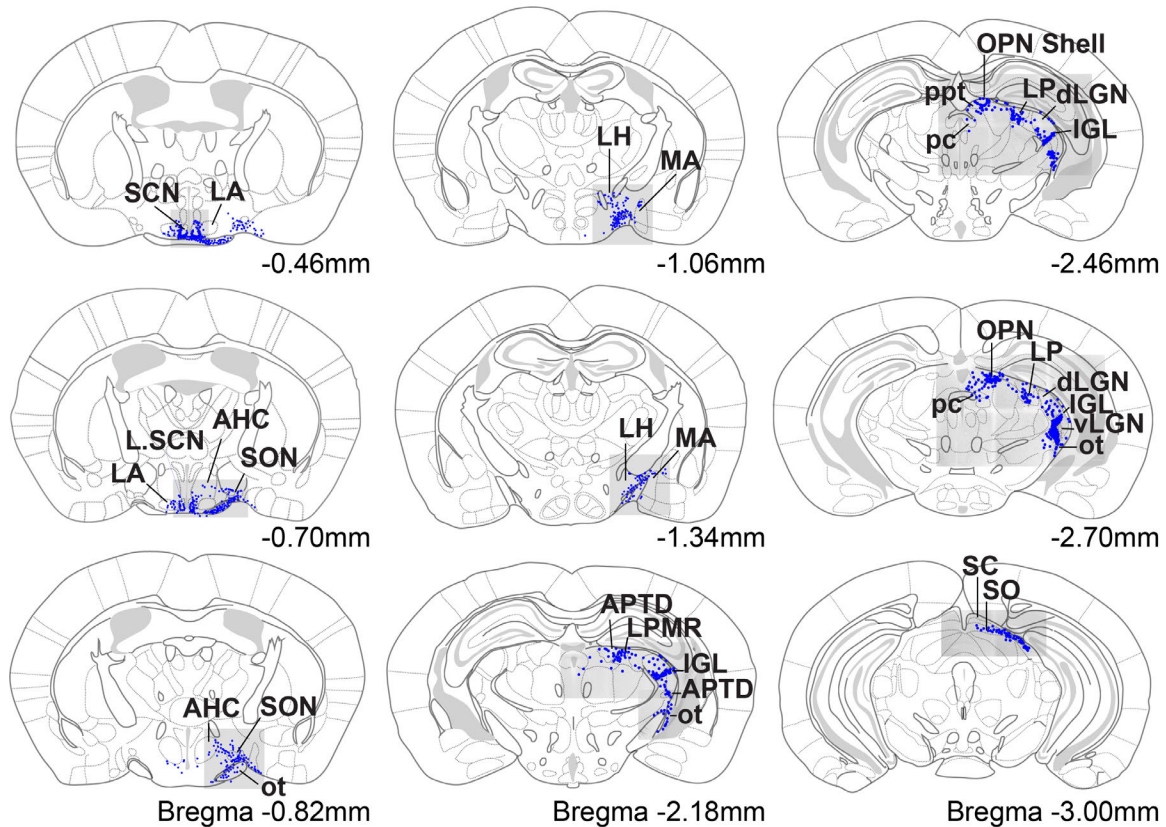

### Supplementary Figure 6: Summary of ipRGC central projections in the *GlyT2<sup>Cre</sup>* mouse

Graphical atlas maps (blue: axons and terminals) drawn from the brain slices of *GlyT2<sup>Cre</sup>* mice using the Franklin & Paxinos Mouse Brain Coordinate Atlas. suprachiasmatic nucleus (SCN) supraoptic nucleus (SON), optic tract (ot), lateral anterior hypothalamic (LA), anterior hypothalamic (AHC), lateral hypothalamus (LH), Medial amygdalar nucleus (MA) superior colliculus (SC), stratum opticum (SO), posterior pretectal area (PPT), olivary pretectal nucleus core & shell (OPN), ventrolateral geniculate complex (vLGN), intergeniculate leaflet (IGL), lateral posterior nucleus (LP), dorsolateral geniculate complex (dLGN).

## A subtype of melanopsin ganglion cells encodes ground luminance

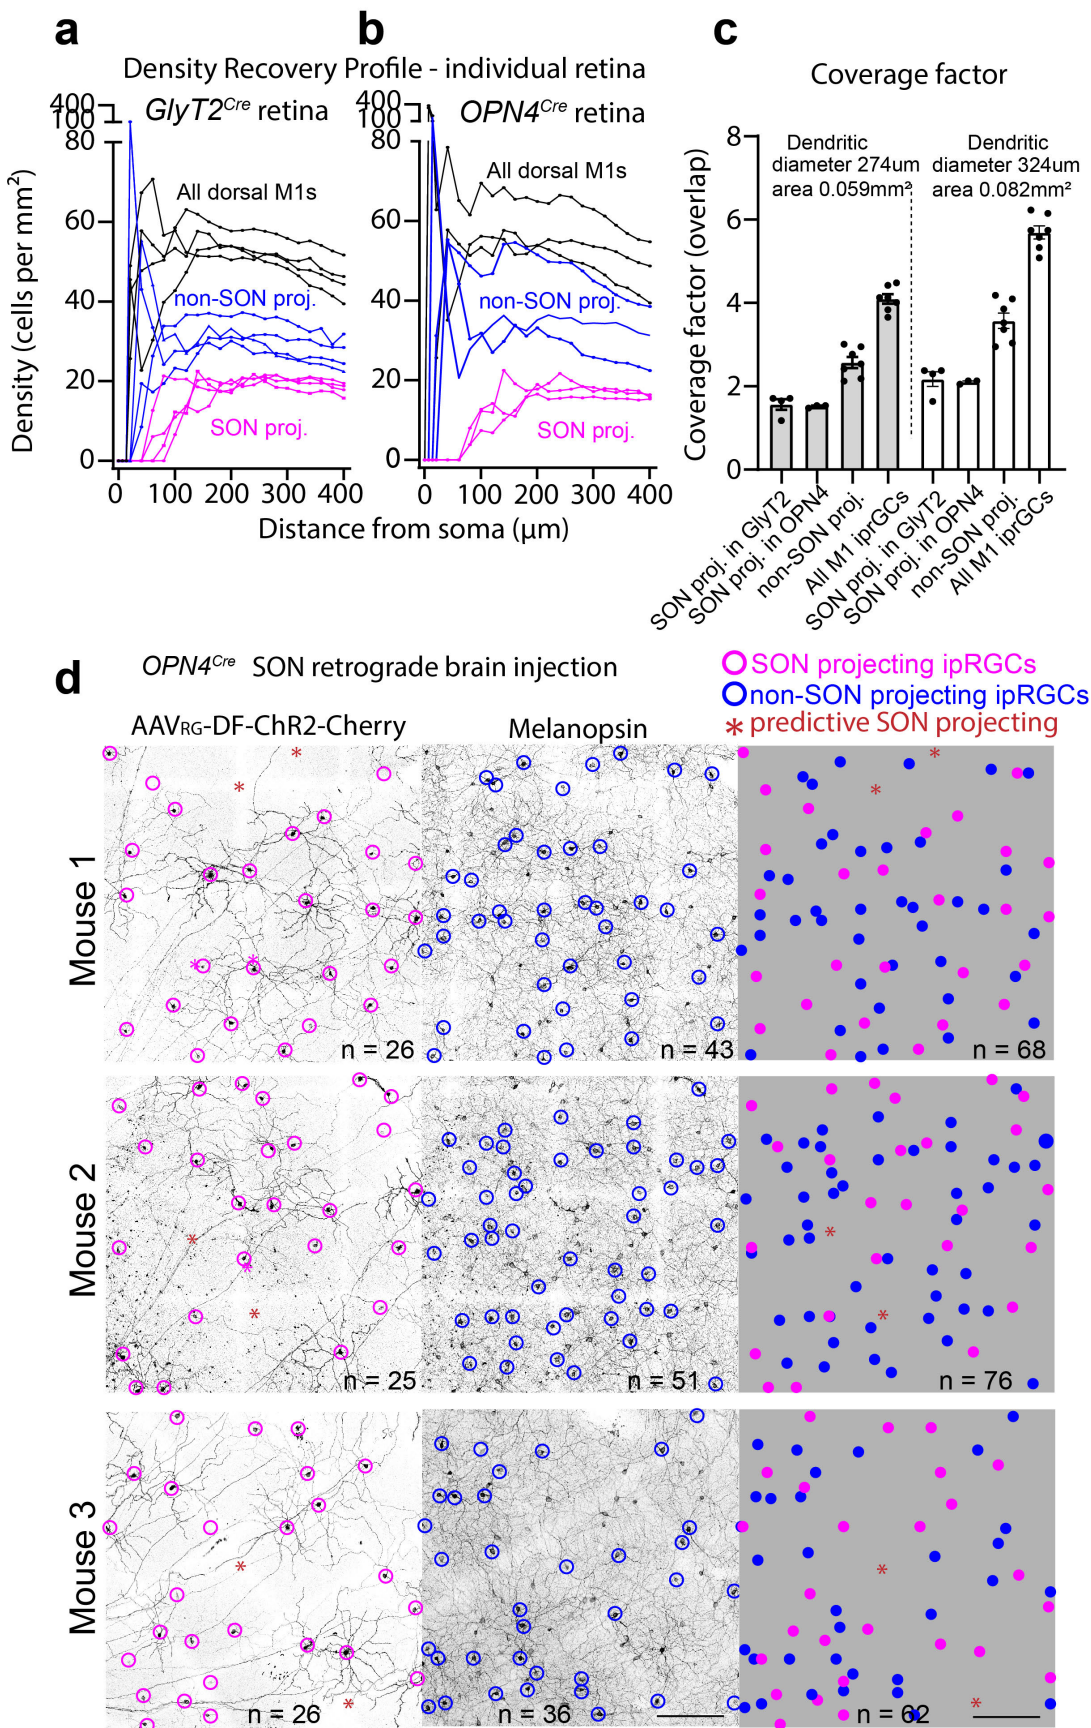

## A subtype of melanopsin ganglion cells encodes ground luminance

### Supplementary Figure 7: Stereotactic SON injection identifies M1 GlyT2 ipRGCs

**(a,b)** Density recovery profile (per retina) of dorsal M1 ipRGCs labeled by central injection (SON) in *GlyT2<sup>Cre</sup>* (a) and *OPN4<sup>Cre</sup>* (b) mice. Density recovery profiles display density of neighboring M1 ipRGC cell bodies at distances ( $\mu\text{m}$ ) from each soma for All M1 ipRGCs (black), non-SON projecting M1 ipRGCs (blue), and SON-projecting M1 ipRGCs (magenta). M1 ipRGCs were identified morphologically. SON-projecting M1 ipRGCs = labeled from retrograde injection, non-SON projecting M1 ipRGCs = M1 ipRGCs not labeled from retrograde injection, All dorsal M1 ipRGCs = SON + non-SON projecting M1 ipRGCs. **(c)** Coverage factor  $e_i$ : the proportion of dendritic overlap calculated from the average diameter of *GlyT2<sup>Cre</sup>* M1 ipRGCs measured from either Neurobiotin fills (left) or calculated from the average diameter of M1 ipRGCs reported by Berson et al. 2010<sup>2</sup> (right). (c - Left) **(d)** Dorsal retina of M1 ipRGCs (OFF stratifying) labeled (TdTomato) by retrograde central injection (SON) in *OPN4<sup>Cre</sup>* retina (open magenta circles over soma). (g - middle) M1 ipRGCs not labeled by central injection (melanopsin staining) (blue circles over soma). (g right) overlap of SON (magenta) and non-SON (blue) projecting M1 ipRGCs in the dorsal retina. Brown \* = predicted as unlabeled SON projecting M1 ipRGC (*GlyT2<sup>Cre</sup>* ipRGC) based on mosaic spacing (still considered non-SON (blue) projecting for any calculations). N = 3 retina for each strain. Area = 1mm<sup>2</sup>. Values are mean $\pm$ SEM. Scale bars: (d); 200  $\mu\text{m}$ , (i,ii); 200  $\mu\text{m}$ .

## A subtype of melanopsin ganglion cells encodes ground luminance

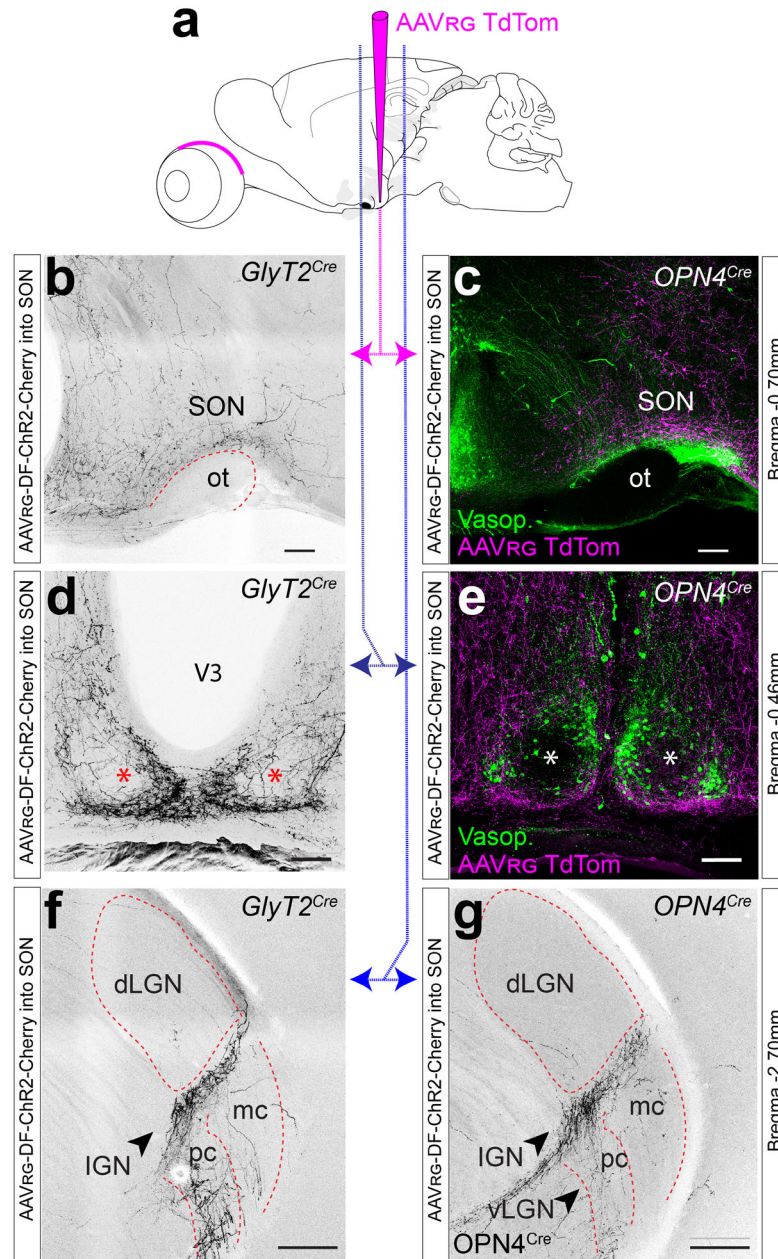

### Supplementary Figure 8: SON ipRGCs have unique innervation to circadian brain regions

**(a-i)** Focal injections of Cre-dependent retroAAV (AAVRG-DF-ChR2-mCherry) into the supraoptic nucleus (SON) of *GlyT2<sup>Cre</sup>* (left) and *OPN4<sup>Cre</sup>* (right) mice. In confocal images of coronal brain slice (200 $\mu$ m) retrograde tracing is observed in SON (**a,b**), shell of the suprachiasmatic nucleus (SCN)(**e,f**), and the parvocellular division (pc) and intergeniculate leaflet (IGL) (h,i) of the geniculate complex, in a projection pattern similar that observed in brain slices from anterograde eye injections in *GlyT2<sup>Cre</sup>* mice (Fig. 9-13). **(c,f)** Co-stained with vasopressin (green) to aid in anatomical visualization of the SON and SCN shell. Confocal images of brain slices from anterograde eye injection of Cholera toxin subunit B (CTB) (**d,g**) provided for anatomical comparison. Distance from Bregma

## A subtype of melanopsin ganglion cells encodes ground luminance

determined anatomically using Franklin & Paxinos Mouse Brain Atlas. Scale bar a; 1mm, b,c; 200 $\mu$ m, d-f; 100 $\mu$ m, g-i; 250 $\mu$ m.

Table 1: Antibodies and immunostaining

| Antibodies/Dyes                          | Concentration               | Duration                      | Source                        | Identifier        |
|------------------------------------------|-----------------------------|-------------------------------|-------------------------------|-------------------|
| Cholera toxin subunit B, Alexa Flour 488 | 1- $\mu$ l IV eye injection | In vivo - 1 wk                | Life Technologies Corporation |                   |
| Rabbit Anti-Melanopsin                   | 1:2000                      | Retina - 3days - (rt)         | ATSBio                        | Cat#: AB-N39      |
| Chicken Anti-Cherry Antibody             | 1:1000                      | Retina - 3days - (rt)         | Abcam                         | Cat#: ab205402    |
|                                          | 1:1000                      | Brain slice - overnight (rt)  |                               |                   |
| Goat Anti-GFP Antibody                   | 1:1000                      | Retina - 3days - (rt)         | Abcam                         | CAT#: ab5450      |
|                                          | 1:1000                      | Brain slice - overnight (rt)  |                               |                   |
| Goat Anti-Cholera Toxin subunit B        | 1:4000                      | Brain slice - over night (rt) | List Labs                     | Cat#: 703         |
| Rabbit Anti-Vasopressin Antibody         | 1:5000                      | Overnight - (rt)              | Immunostar                    | Cat#: 20069       |
| Rabbit Anti-UV Cone Opsin Antibody       | 1:1000                      | Overnight - (rt)              | Millipore                     | Cat#: ab5407      |
| Rabbit Anti-SMI-32 Antibody              | 1:1000                      | Overnight - (rt)              | BioLegend                     | Cat#: ab509997    |
| Donkey Anti-Rabbit Alexa Flour 647       | 1:1000                      | Overnight - (rt)              | Jackson Immuno Research       | Cat#: 711-605-152 |
| Donkey Anti-Goat Alexa Flour 488         | 1:1000                      | Overnight - (rt)              | Jackson Immuno Research       | Cat#: 705-545-147 |
| Donkey Anti-Chicken Alexa Fluor Cy3      | 1:1000                      | Overnight - (rt)              | Jackson Immuno Research       | Cat#: 703-165-155 |

Table 2: Coverage Factors for Various ipRGC cells from GlyT2 and OPN4 mice using random intercept mixed effects models.

| Cell Type         | Area from Fills (0.082mm <sup>2</sup> ) |                   | Area from Berson (0.059mm <sup>2</sup> ) |                   | p-value <sup>b</sup> |
|-------------------|-----------------------------------------|-------------------|------------------------------------------|-------------------|----------------------|
|                   | GlyT2 <sup>a</sup>                      | OPN4 <sup>a</sup> | GlyT2 <sup>a</sup>                       | OPN4 <sup>a</sup> |                      |
| SON M1 ipRGCs     | 2.17 (0.247)                            | 2.1 (0.259)       | 1.56 (0.178)                             | 1.51 (0.186)      | 0.851                |
| Non-SON M1 ipRGCs | 3.59 (0.247)                            | 3.55 (0.259)      | 2.58 (0.178)                             | 2.56 (0.186)      | 0.926                |
| All M1 ipRGCs     | 5.74 (0.247)                            | 5.63 (0.259)      | 4.13 (0.178)                             | 4.05 (0.186)      | 0.762                |

<sup>a</sup> Values written as Mean(SE).

<sup>b</sup> P-values comparing means for OPN4 vs. GlyT2 coverages from t-tests using Satterthwaite's method.

1. Bleckert, A., Schwartz, G.W., Turner, M.H., Rieke, F. & Wong, R.O. Visual space is represented by nonmatching topographies of distinct mouse retinal ganglion cell types. *Current biology : CB* **24**, 310-315 (2014).
2. Berson, D.M., Castrucci, A.M. & Provencio, I. Morphology and mosaics of melanopsin-expressing retinal ganglion cell types in mice. *The Journal of comparative neurology* **518**, 2405-2422 (2010).
